# Supplementary material
Source: PubMed Central journal article supplement (PMC8594513)
Supplement: ccm-49-02042-s001.pdf [file ccm-49-02042-s001.pdf]

**COVID-19 as cause of viral sepsis: A Systematic Review and Meta-Analysis.**

**“Online Supplement”**

Eleni Karakike, Evangelos J. Giamarellos-Bourboulis, Miltiades Kyprianou, Carolin  
Fleischmann-Struzek, Mathias W. Pletz, Mihai G. Netea, Konrad Reinhart, Evdoxia  
Kyriazopoulou

## Table of contents

| Content                                                                                                                                                                                                                                                                                         | Page |
|-------------------------------------------------------------------------------------------------------------------------------------------------------------------------------------------------------------------------------------------------------------------------------------------------|------|
| <b>Search Strategy.</b>                                                                                                                                                                                                                                                                         | 3    |
| <b>Supplementary Figures.</b>                                                                                                                                                                                                                                                                   | 5    |
| <b>Supplementary Figure 1.</b> Funnel plots of publication bias for studies estimating COVID-19 related sepsis prevalence A) in the Intensive Care Unit and B) in the general ward.                                                                                                             | 5    |
| <b>Supplementary Figure 2.</b> Subgroup analysis for the primary endpoint among adult patients with COVID-19 in the Intensive Care Unit, according to geographical location.                                                                                                                    | 6    |
| <b>Supplementary Figure 3</b> Subgroup analysis for the primary endpoint among adult patients with COVID-19 in the Intensive Care Unit, according to chronological period of enrollment.                                                                                                        | 7    |
| <b>Supplementary Figure 4.</b> Forest plot of COVID-19-related sepsis prevalence in adult patients initially hospitalized in the general ward.                                                                                                                                                  | 8    |
| <b>Supplementary Figure 5.</b> Subgroup analysis for the primary endpoint among adult patients with COVID-19, initially hospitalized in the general ward. Forest plot of sepsis prevalence among patients with non-pulmonary versus pulmonary acute organ dysfunction.                          | 9    |
| <b>Supplementary Figure 6.</b> A) Forest plot of the overall COVID-19-related sepsis prevalence in included studies with B) respective Funnel plot of publication bias.                                                                                                                         | 10   |
| <b>Supplementary Figure 7.</b> Forest plot of septic shock prevalence among adult patients with COVID-19, hospitalized in the Intensive Care Unit (ICU).                                                                                                                                        | 11   |
| <b>Supplementary Figure 8.</b> Forest plot of organ support or replacement prevalence among adult patients with COVID-19, hospitalized in the Intensive Care Unit (ICU): A) mechanical ventilation; B) renal replacement; C) vasopressor use and D) extracorporeal membrane oxygenation (ECMO). | 12   |
| <b>Supplementary Figure 9.</b> Forest plot of admission in the Intensive Care Unit (ICU), among adult patients with COVID-19, initially hospitalized in the general ward.                                                                                                                       | 13   |
| <b>Supplementary Figure 10.</b> Forest plot of COVID-19-related sepsis prevalence among hospitalized children A) in the Intensive Care Unit (ICU) and B) in the general ward. C) Funnel plot of publication bias for studies in the ICU and D) in general ward.                                 | 14   |
| <b>Supplementary Figure 11.</b> A) Forest plot of COVID-19-related sepsis prevalence among hospitalized children. Abbreviation: CI, confidence interval. B) Funnel plot of publication bias.                                                                                                    | 15   |
| <b>Supplementary Figure 12.</b> A) Forest plot of mortality among children with COVID-19 hospitalized in the Intensive Care Unit (ICU) with B) respective Funnel plot of publication bias.                                                                                                      | 16   |
| <b>Supplementary Tables.</b>                                                                                                                                                                                                                                                                    | 17   |
| <b>Supplementary Table 1.</b> Characteristics of the included studies.                                                                                                                                                                                                                          | 17   |
| <b>Supplementary Table 2.</b> Risk assessment of included studies according to Newcastle-Ottawa Quality Assessment Scale.                                                                                                                                                                       | 23   |
| <b>Supplementary Table 3.</b> Risk assessment of included studies according to MINORS score.                                                                                                                                                                                                    | 28   |
| <b>Supplementary Table 4.</b> Prevalence of organ dysfunctions in adult patients with COVID-19 in the Intensive Care Unit, as reported in included studies.                                                                                                                                     | 33   |
| <b>Supplementary Table 5.</b> Prevalence of specific organ dysfunctions in children hospitalized with COVID-19, as reported in included studies.                                                                                                                                                | 35   |

## Search strategy

| PubMed (Date Run: 29/03/2021) |                                                                                                                                                                                                                                                                                                                                                                                                                                                                                                                                                                                                                                                                                                                                                                                                                                                                                                                                                                                                                                                                                                                                                                                                                                                                                                                                                                                                                                                                                                                                                                                                                                                                                                                                                                                                                                                                                                                                                                                                                                                                                                                                          |       |
|-------------------------------|------------------------------------------------------------------------------------------------------------------------------------------------------------------------------------------------------------------------------------------------------------------------------------------------------------------------------------------------------------------------------------------------------------------------------------------------------------------------------------------------------------------------------------------------------------------------------------------------------------------------------------------------------------------------------------------------------------------------------------------------------------------------------------------------------------------------------------------------------------------------------------------------------------------------------------------------------------------------------------------------------------------------------------------------------------------------------------------------------------------------------------------------------------------------------------------------------------------------------------------------------------------------------------------------------------------------------------------------------------------------------------------------------------------------------------------------------------------------------------------------------------------------------------------------------------------------------------------------------------------------------------------------------------------------------------------------------------------------------------------------------------------------------------------------------------------------------------------------------------------------------------------------------------------------------------------------------------------------------------------------------------------------------------------------------------------------------------------------------------------------------------------|-------|
| Step                          | Search strategy                                                                                                                                                                                                                                                                                                                                                                                                                                                                                                                                                                                                                                                                                                                                                                                                                                                                                                                                                                                                                                                                                                                                                                                                                                                                                                                                                                                                                                                                                                                                                                                                                                                                                                                                                                                                                                                                                                                                                                                                                                                                                                                          | Found |
| #1                            | <p>[(Covid AND sepsis) OR (Covid AND septic*) OR (Covid and "organ failure") OR (Covid and "organ dysfunction") OR (Covid AND "organ support") OR (Covid AND SOFA) OR (Covid and "intensive care") OR (Covid AND "organ replacement") OR (Covid AND "host response") OR (Covid AND "immune response") OR (Covid AND "renal failure") OR (Covid AND "renal dysfunction") OR (Covid AND „pulmonary failure") OR (Covid AND „pulmonary dysfunction") OR (Covid AND „respiratory failure") OR (Covid AND „respiratory dysfunction") OR (Covid AND „liver failure") OR (Covid AND „liver dysfunction") OR (Covid AND „cardiac failure") OR (Covid AND „cardiac dysfunction") OR (Covid AND „shock") OR (Covid AND „neurologic dysfunction") OR (Covid AND „neurological dysfunction") OR (Covid AND thrombocytopenia) OR (Covid AND acidosis)] OR [(SARS-CoV-2 AND sepsis) OR (SARS-CoV-2 AND septic*) OR (SARS-CoV-2 AND "organ failure") OR (Covid and "organ dysfunction") OR (SARS-CoV-2 AND "organ support") OR (SARS-CoV-2 AND SOFA) OR (SARS-CoV-2 AND "intensive care") OR (SARS-CoV-2 AND "organ replacement") OR (SARS-CoV-2 AND "host response") OR (SARS-CoV-2 AND "immune response") OR (SARS-CoV-2 AND "renal failure") OR (SARS-CoV-2 AND "renal dysfunction") OR (SARS-CoV-2 AND „pulmonary failure") OR (SARS-CoV-2 AND „pulmonary dysfunction") OR (SARS-CoV-2 AND „respiratory failure") OR (SARS-CoV-2 AND „respiratory dysfunction") OR (SARS-CoV-2 AND „liver failure") OR (SARS-CoV-2 AND „liver dysfunction") OR (SARS-CoV-2 AND „cardiac failure") OR (SARS-CoV-2 AND „cardiac dysfunction") OR (SARS-CoV-2 AND „shock") OR (SARS-CoV-2 AND „neurologic dysfunction") OR (SARS-CoV-2 AND „neurological dysfunction") OR (SARS-CoV-2 AND thrombocytopenia) OR (SARS-CoV-2 AND acidosis)] Filters: Full text, Clinical Study, Clinical Trial, Clinical Trial, Phase I, Clinical Trial, Phase II, Clinical Trial, Phase III, Clinical Trial, Phase IV, Comparative Study, Controlled Clinical Trial, Multicenter Study, Observational Study, Pragmatic Clinical Trial, Randomized Controlled Trial, Humans, English</p> | 1703  |

**Cochrane Central Register of Clinical Trials (Date Run: 29/03/21)**

| <b>ID</b> | <b>Search strategy</b>                                                                                                             | <b>Found</b> |
|-----------|------------------------------------------------------------------------------------------------------------------------------------|--------------|
| #1        | (COVID-19):ti,ab,kw OR ("SARS Co-V"):ti,ab,kw                                                                                      | 4287         |
| #2        | ("sepsis"):ti,ab,kw OR ("organ damage"):ti,ab,kw OR ("organ failure"):ti,ab,kw OR ("sofa"):ti,ab,kw OR ("intensive care"):ti,ab,kw | 35319        |
| #3        | ("immune response"):ti,ab,kw OR ("host reaction"):ti,ab,kw                                                                         | 9291         |
| #4        | ("renal failure"):ti,ab,kw OR ("renal dysfunction"):ti,ab,kw                                                                       | 8807         |
| #5        | ("respiratory failure"):ti,ab,kw OR ("respiratory distress"):ti,ab,kw                                                              | 10780        |
| #6        | ("liver damage"):ti,ab,kw OR (liver replacement):ti,ab,kw                                                                          | 1331         |
| #7        | ("cardiac failure"):ti,ab,kw OR ("cardiovascular collapse"):ti,ab,kw                                                               | 968          |
| #8        | ("shock"):ti,ab,kw OR ("acidosis"):ti,ab,kw                                                                                        | 13122        |
| #9        | ("neurological impairment"):ti,ab,kw OR ("encephalopathy"):ti,ab,kw                                                                | 3663         |
| #10       | ("thrombocytopenia"):ti,ab,kw OR ("thrombopenia"):ti,ab,kw                                                                         | 9810         |
| #11       | #2 OR #3 OR #4 OR #5 OR #6 OR #7 OR #8 OR #9 OR #10                                                                                | 81622        |
| #12       | #1 AND #11                                                                                                                         | 1245         |

**Google Scholar (Date Run: 29/03/21)**

| <b>Step</b> | <b>Search strategy</b>                                                                                                                                                                                                                                                                                                                                                                                                                                                                                                                                                                                                                                                                                                                                                                                                                                                                                                                                                                                                                                                                                                                                                                                                                                                                                                                                                                                                                                                                                                                                                                                                                                                                                                                                                                                                                                                                                                                                                                                                                                                                                                                   | <b>Found</b> |
|-------------|------------------------------------------------------------------------------------------------------------------------------------------------------------------------------------------------------------------------------------------------------------------------------------------------------------------------------------------------------------------------------------------------------------------------------------------------------------------------------------------------------------------------------------------------------------------------------------------------------------------------------------------------------------------------------------------------------------------------------------------------------------------------------------------------------------------------------------------------------------------------------------------------------------------------------------------------------------------------------------------------------------------------------------------------------------------------------------------------------------------------------------------------------------------------------------------------------------------------------------------------------------------------------------------------------------------------------------------------------------------------------------------------------------------------------------------------------------------------------------------------------------------------------------------------------------------------------------------------------------------------------------------------------------------------------------------------------------------------------------------------------------------------------------------------------------------------------------------------------------------------------------------------------------------------------------------------------------------------------------------------------------------------------------------------------------------------------------------------------------------------------------------|--------------|
| #1          | <p>[(Covid AND sepsis) OR (Covid AND septic*) OR (Covid and "organ failure") OR (Covid and "organ dysfunction") OR (Covid AND "organ support") OR (Covid AND SOFA) OR (Covid and "intensive care") OR (Covid AND "organ replacement") OR (Covid AND "host response") OR (Covid AND "immune response") OR (Covid AND "renal failure") OR (Covid AND "renal dysfunction") OR (Covid AND „pulmonary failure") OR (Covid AND „pulmonary dysfunction") OR (Covid AND „respiratory failure") OR (Covid AND „respiratory dysfunction") OR (Covid AND „liver failure") OR (Covid AND „liver dysfunction") OR (Covid AND „cardiac failure") OR (Covid AND „cardiac dysfunction") OR (Covid AND „shock") OR (Covid AND „neurologic dysfunction") OR (Covid AND „neurological dysfunction") OR (Covid AND thrombocytopenia) OR (Covid AND acidosis)] OR [(SARS-CoV-2 AND sepsis) OR (SARS-CoV-2 AND septic*) OR (SARS-CoV-2 AND "organ failure") OR (Covid and "organ dysfunction") OR (SARS-CoV-2 AND "organ support") OR (SARS-CoV-2 AND SOFA) OR (SARS-CoV-2 AND "intensive care") OR (SARS-CoV-2 AND "organ replacement") OR (SARS-CoV-2 AND "host response") OR (SARS-CoV-2 AND "immune response") OR (SARS-CoV-2 AND "renal failure") OR (SARS-CoV-2 AND "renal dysfunction") OR (SARS-CoV-2 AND „pulmonary failure") OR (SARS-CoV-2 AND „pulmonary dysfunction") OR (SARS-CoV-2 AND „respiratory failure") OR (SARS-CoV-2 AND „respiratory dysfunction") OR (SARS-CoV-2 AND „liver failure") OR (SARS-CoV-2 AND „liver dysfunction") OR (SARS-CoV-2 AND „cardiac failure") OR (SARS-CoV-2 AND „cardiac dysfunction") OR (SARS-CoV-2 AND „shock") OR (SARS-CoV-2 AND „neurologic dysfunction") OR (SARS-CoV-2 AND „neurological dysfunction") OR (SARS-CoV-2 AND thrombocytopenia) OR (SARS-CoV-2 AND acidosis)] Filters: Full text, Clinical Study, Clinical Trial, Clinical Trial, Phase I, Clinical Trial, Phase II, Clinical Trial, Phase III, Clinical Trial, Phase IV, Comparative Study, Controlled Clinical Trial, Multicenter Study, Observational Study, Pragmatic Clinical Trial, Randomized Controlled Trial, Humans, English</p> | 1507         |

**Supplementary Figures.**

**Supplementary Figure 1.** Funnel plots of publication bias for studies estimating COVID-19 related sepsis prevalence A) in the Intensive Care Unit and B) in the general ward. Respective test for funnel plot asymmetry was A)  $t = -2.616$ ,  $df = 55$ ,  $p = 0.012$  and B)  $t = 0.897$ ,  $df = 84$ ,  $p = 0.372$ .

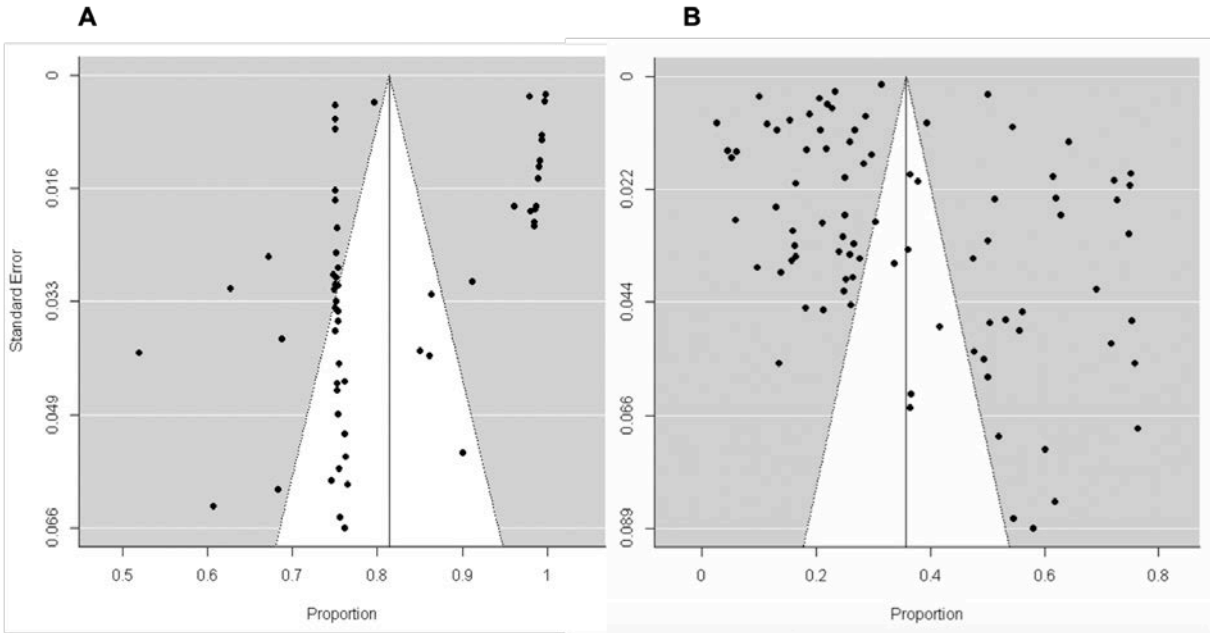

**Supplementary Figure 2.** Subgroup analysis for the primary endpoint among adult patients with COVID-19 in the Intensive Care Unit, according to geographical location. Rest of the world included 1 study from Australia, and 2 multi-national studies. Abbreviation: CI, confidence interval. P-value for comparisons between groups= 0.543

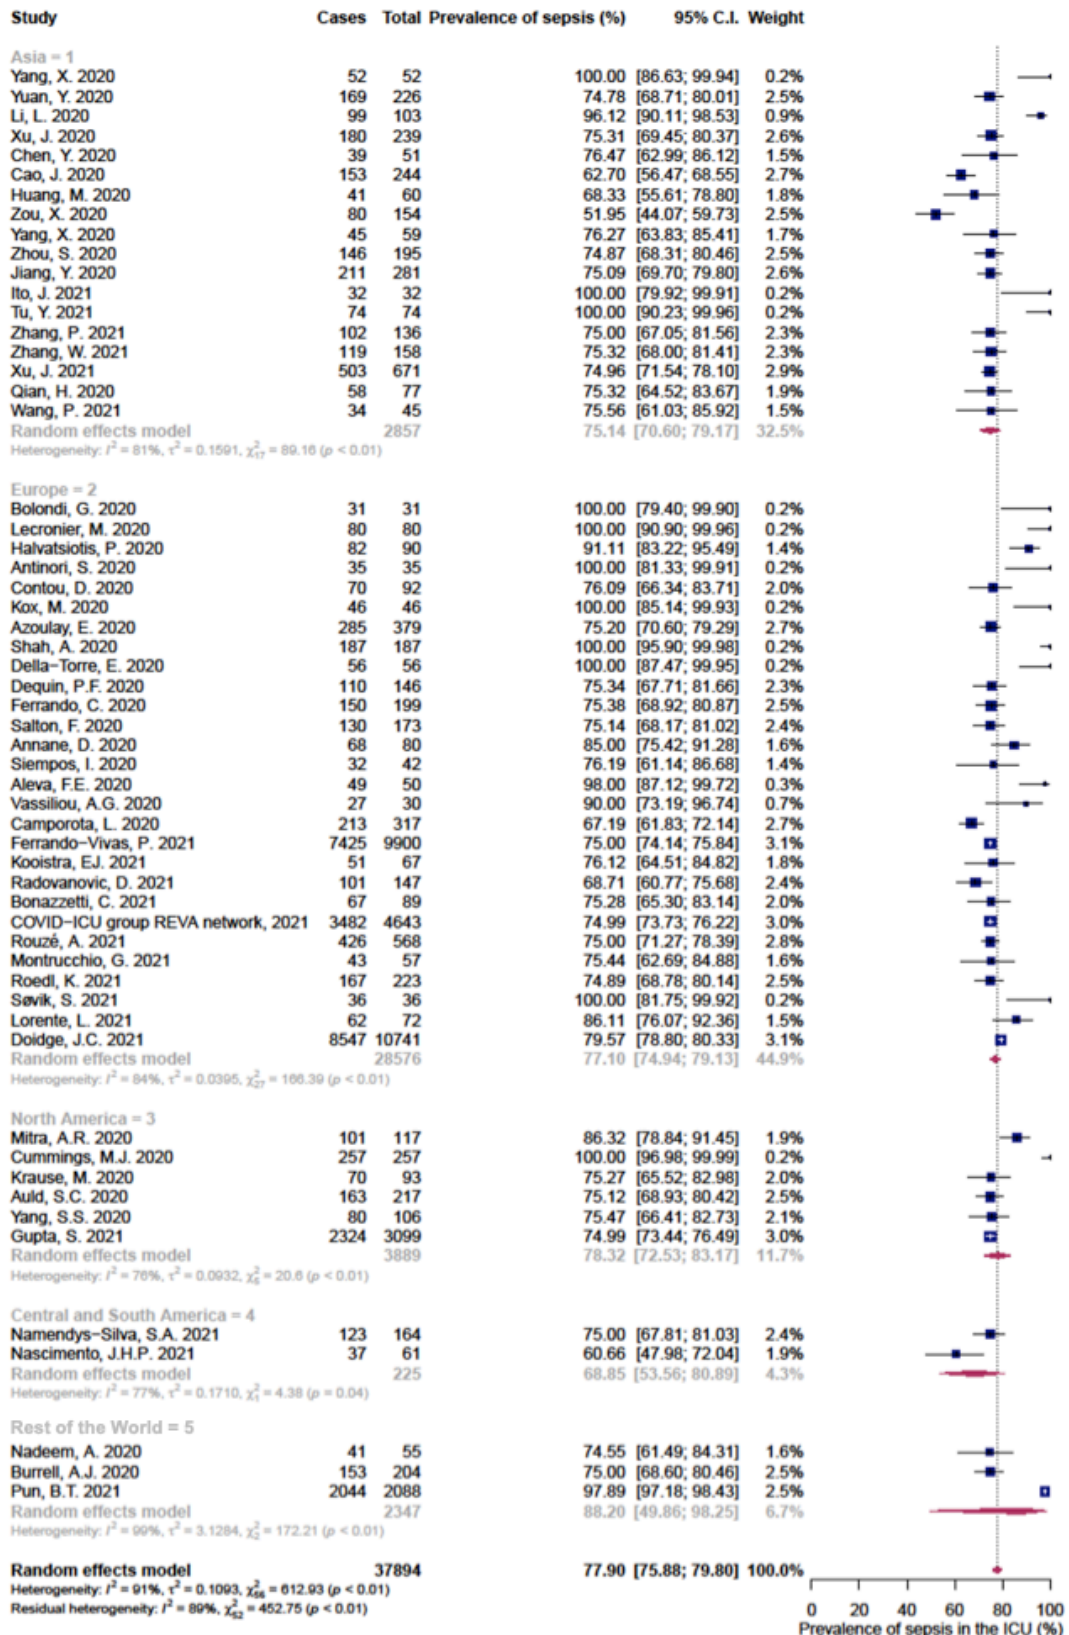

**Supplementary Figure 3.** Subgroup analysis for the primary endpoint among adult patients with COVID-19 in the Intensive Care Unit, according to chronological period of enrollment. Abbreviation: CI, confidence interval. P-value for comparisons between groups= 0.047

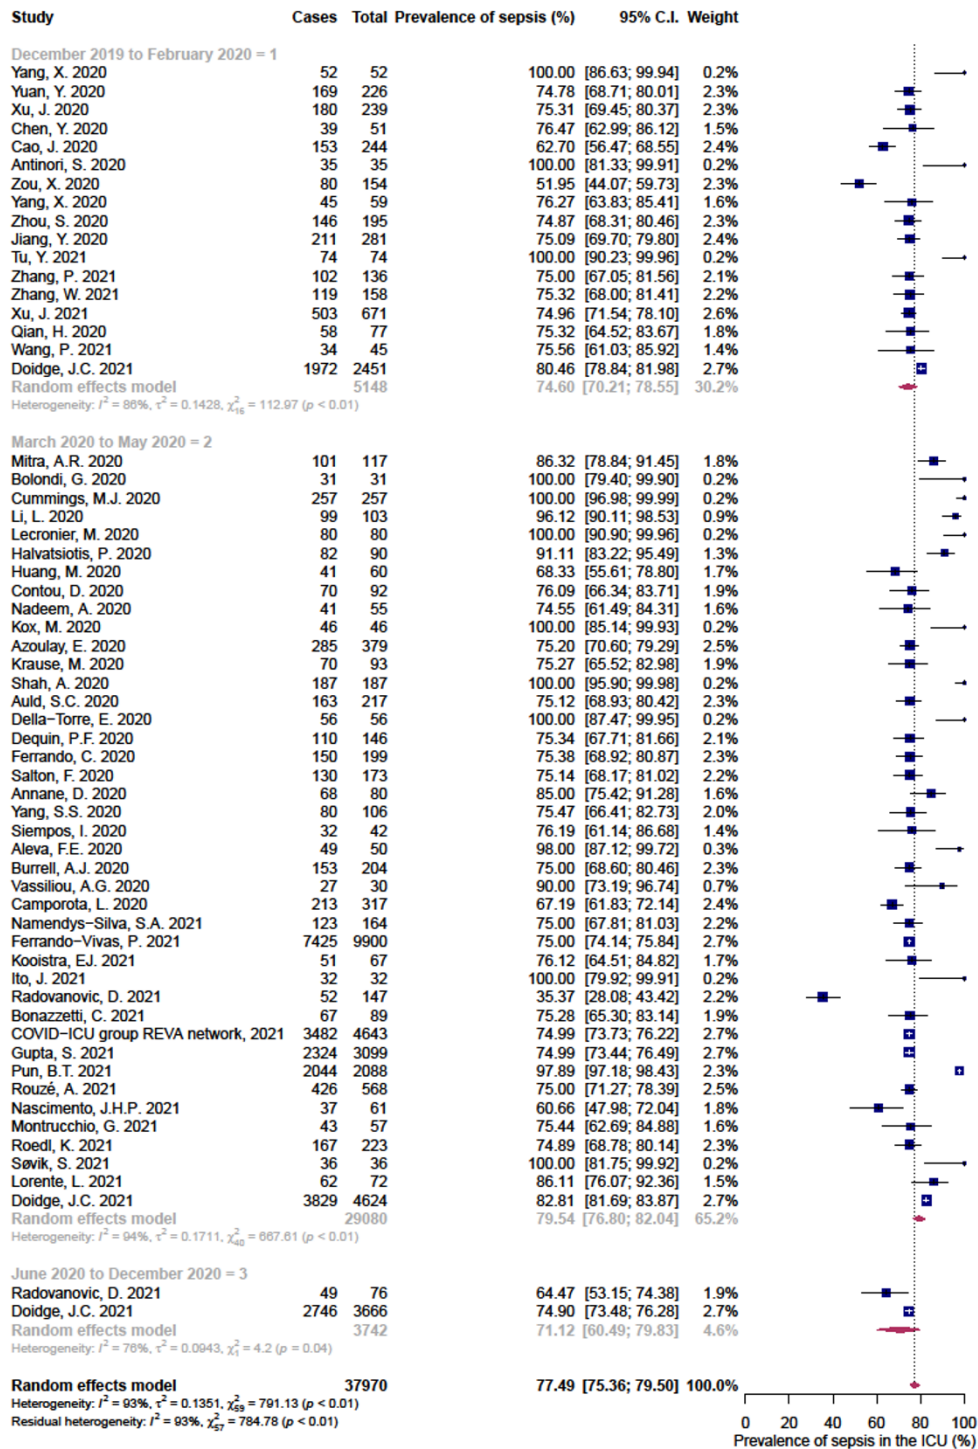

**Supplementary Figure 4.** Forest plot of COVID-19-related sepsis prevalence in adult patients initially hospitalized in the general ward. Abbreviation: CI, confidence interval.

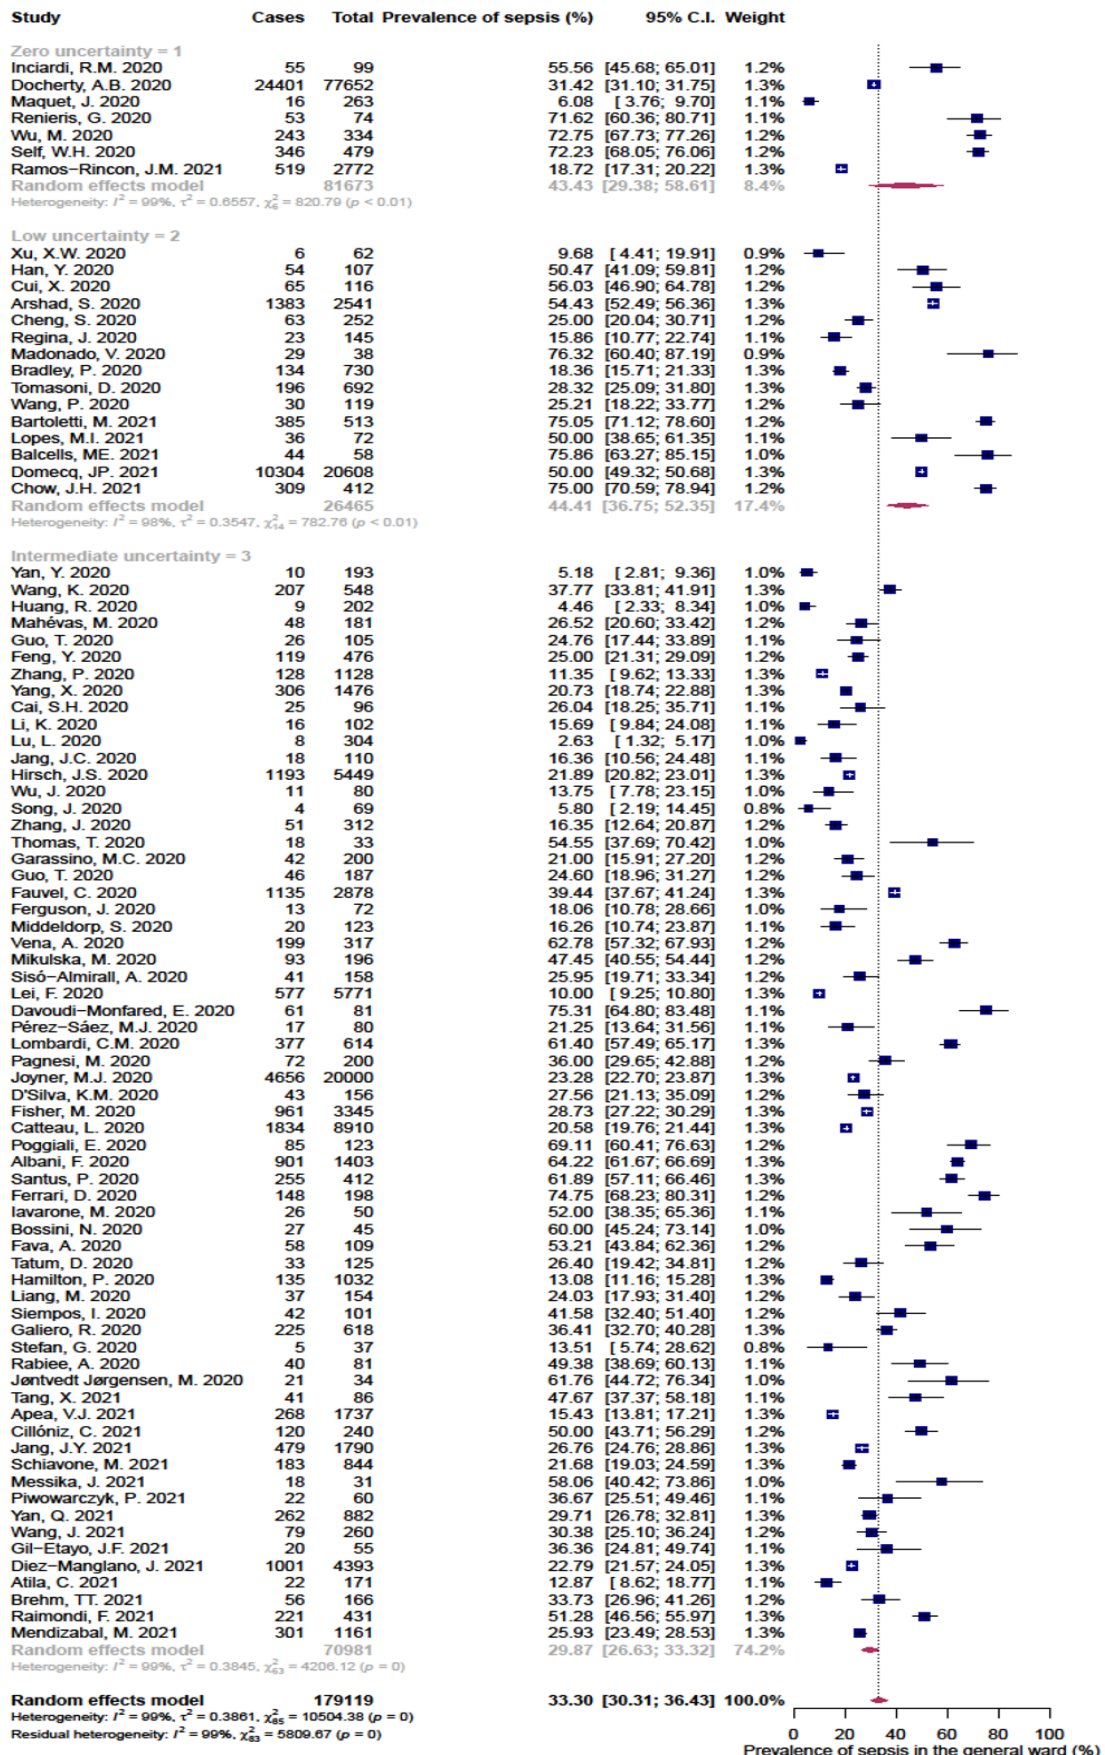



**Supplementary Figure 5.** Subgroup analysis for the primary endpoint among adult patients with COVID-19, initially hospitalized in the general ward. Forest plot of sepsis prevalence among patients with non-pulmonary versus pulmonary acute organ dysfunction. Abbreviation: CI, confidence interval.

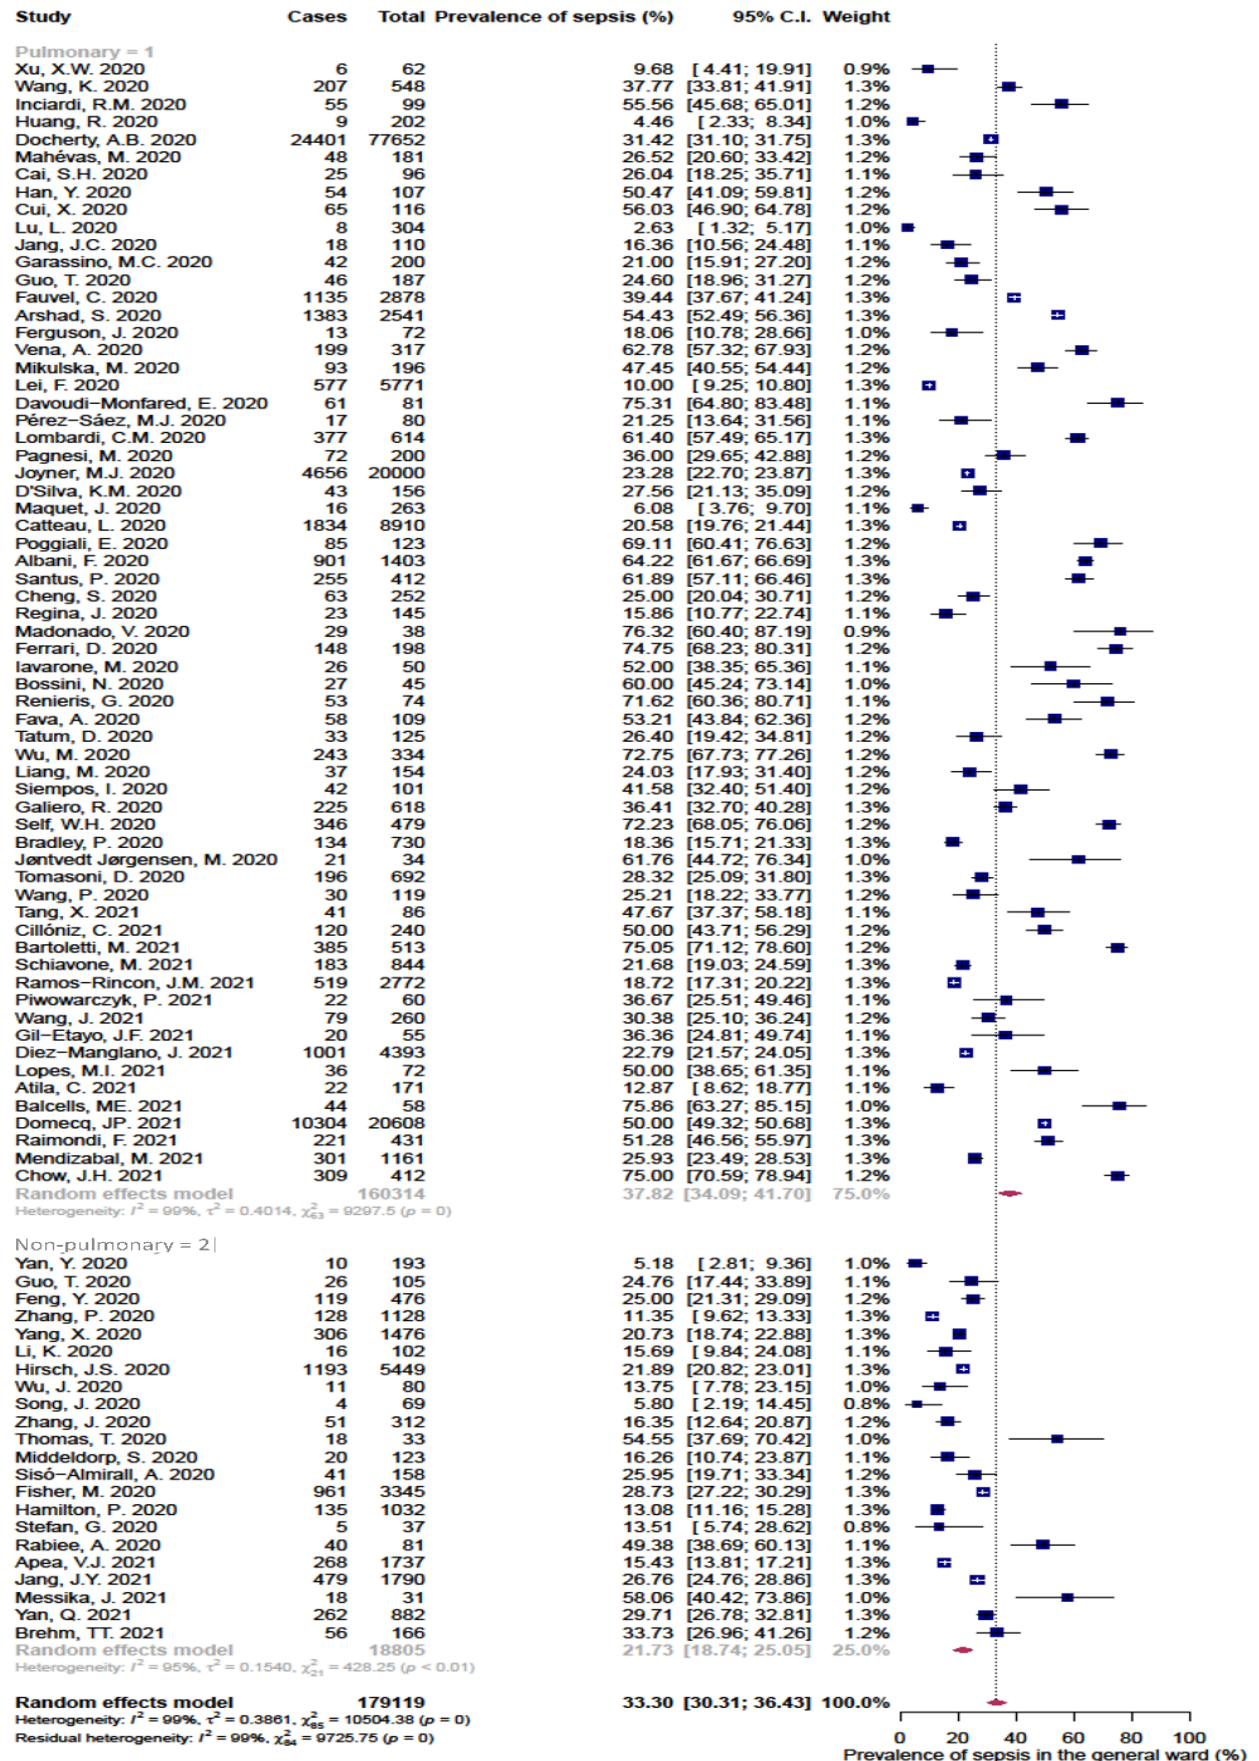

**Supplementary Figure 6.** A) Forest plot of the overall COVID-19-related sepsis prevalence in included studies with B) respective Funnel plot of publication bias. Abbreviation: CI, confidence interval.

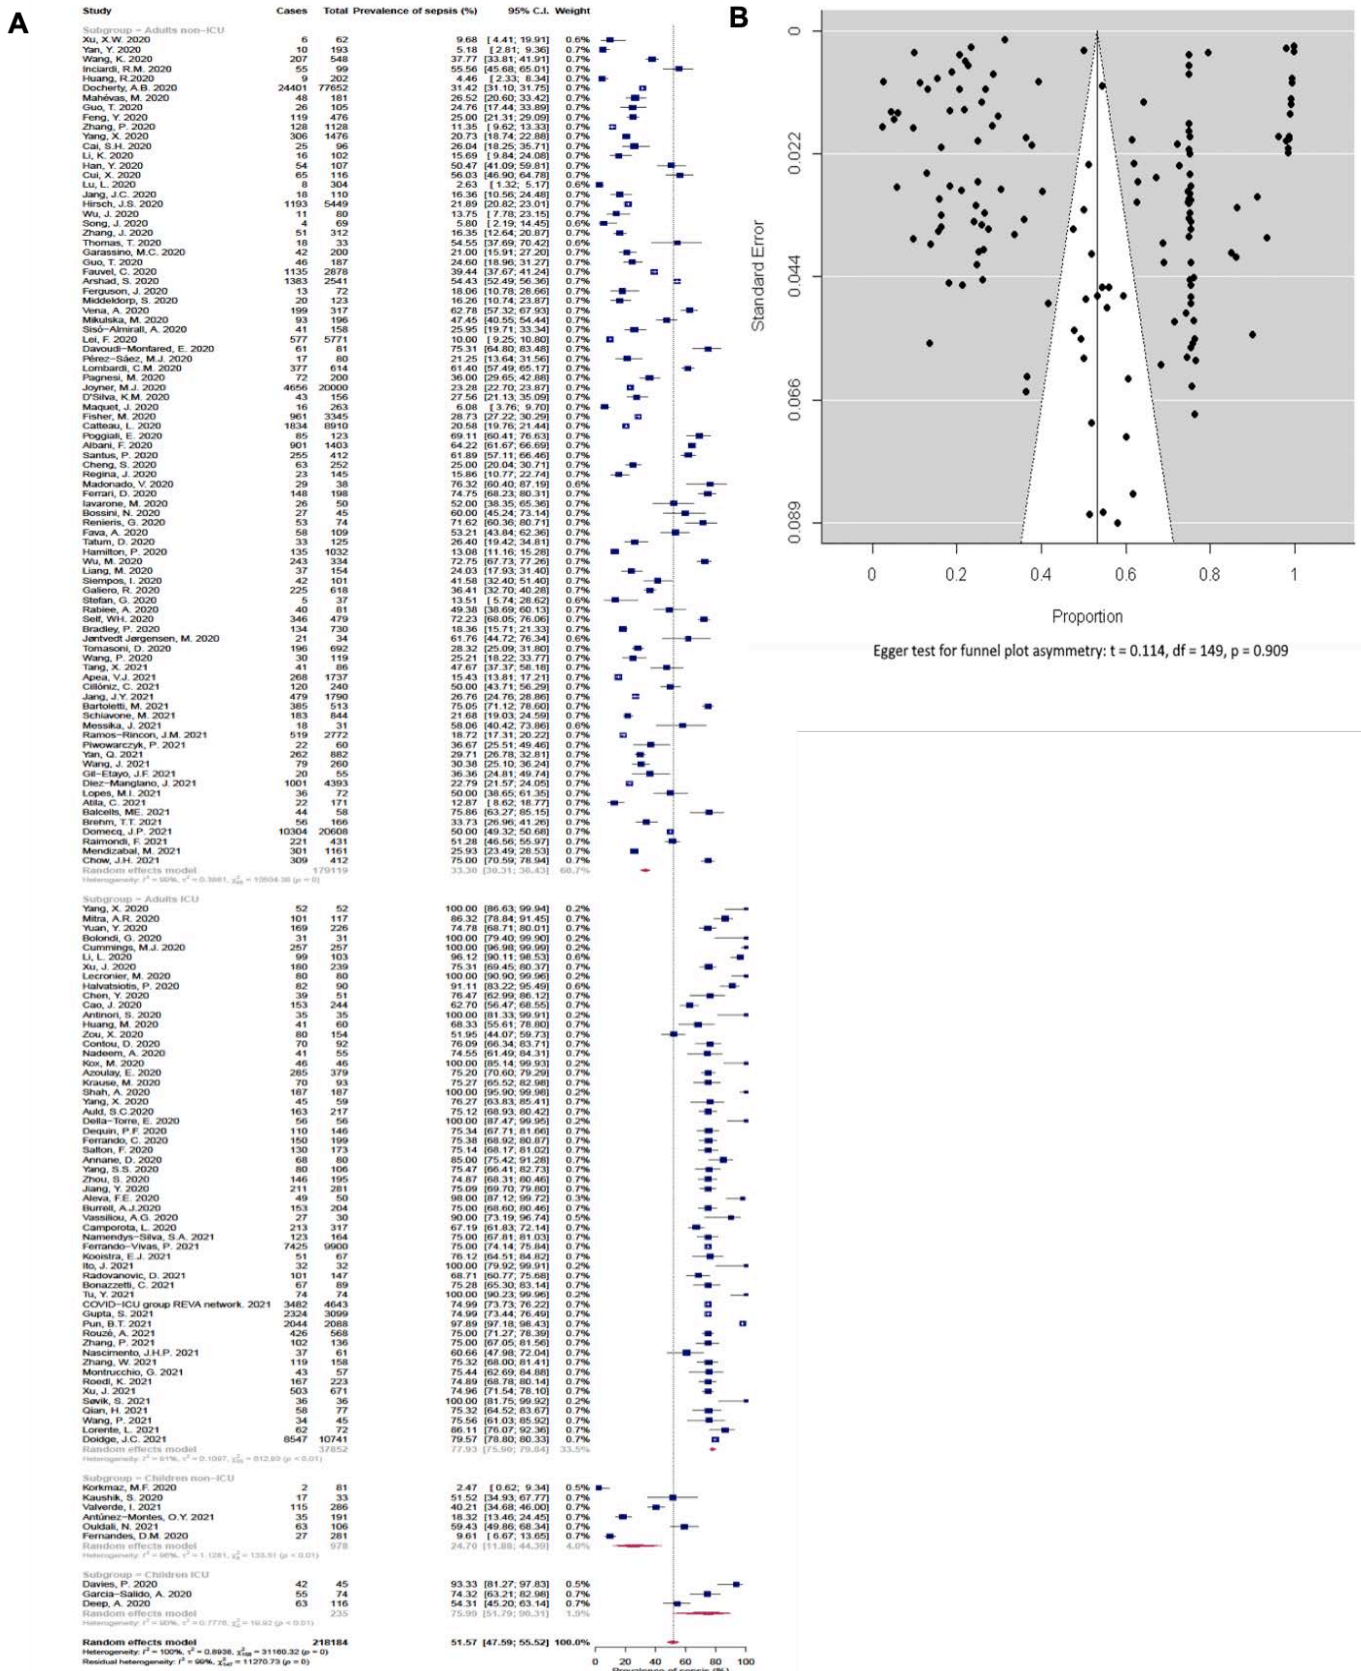

**Supplementary Figure 7.** Forest plot of septic shock prevalence among adult patients with COVID-19, hospitalized in the Intensive Care Unit (ICU). Septic shock was defined by Sepsis-3 in included publications. Egger's test for Funnel plot asymmetry was:  $t= 4.940$ ,  $df= 20$ ,  $p<0.0001$ . Abbreviation: CI, confidence interval.

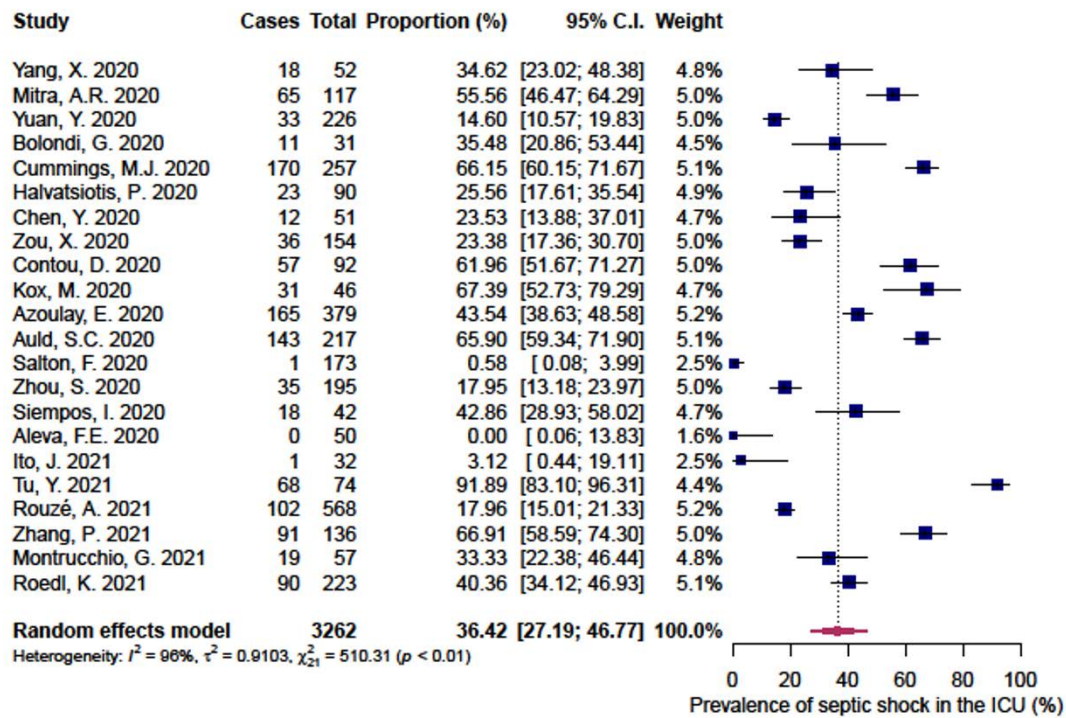

**Supplementary Figure 8.** Forest plot of organ support or replacement prevalence among adult patients with COVID-19, hospitalized in the Intensive Care Unit (ICU): A) mechanical ventilation; B) renal replacement; C) vasopressor use and D) extracorporeal membrane oxygenation (ECMO). Egger's tests for Funnel plot asymmetry were  $t = -4.876$ ,  $df = 51$ ,  $p < 0.0001$ ;  $t = -1.665$ ,  $df = 26$ ,  $p = 0.108$ ;  $t = 3.859$ ,  $df = 22$ ,  $p = 0.0009$ ; and  $t = 1.720$ ,  $df = 25$ ,  $p = 0.098$ , respectively. Abbreviation: CI, confidence interval.

**A**

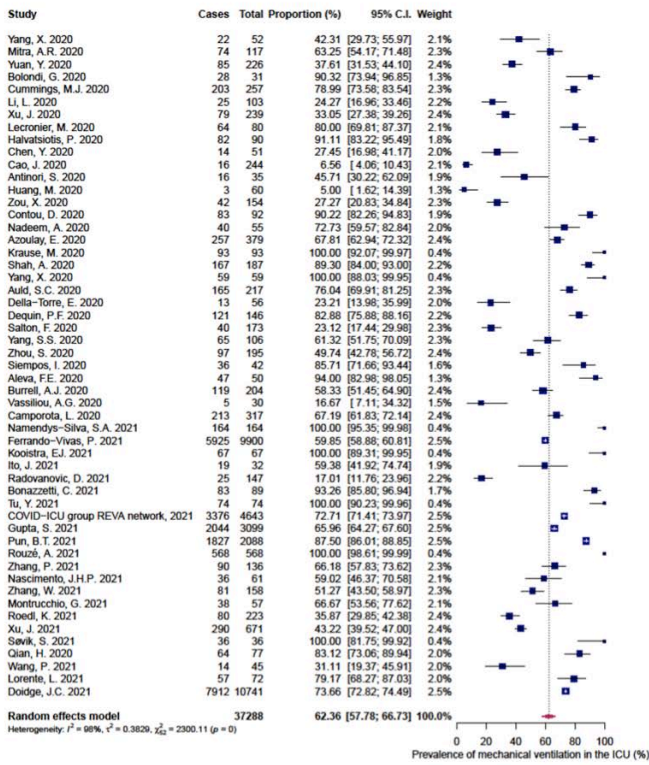

**B**

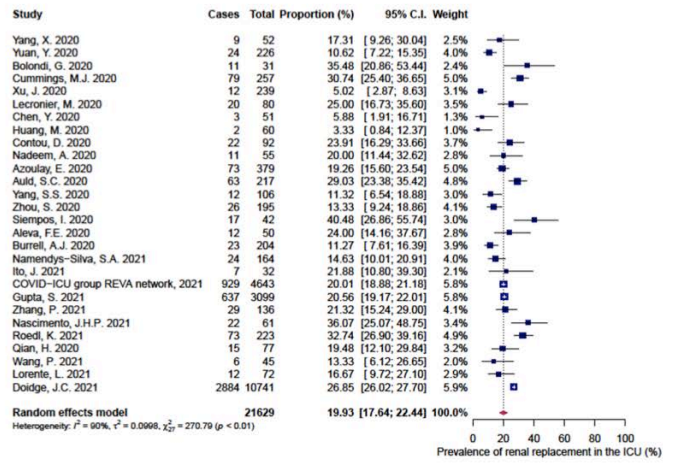

**C**

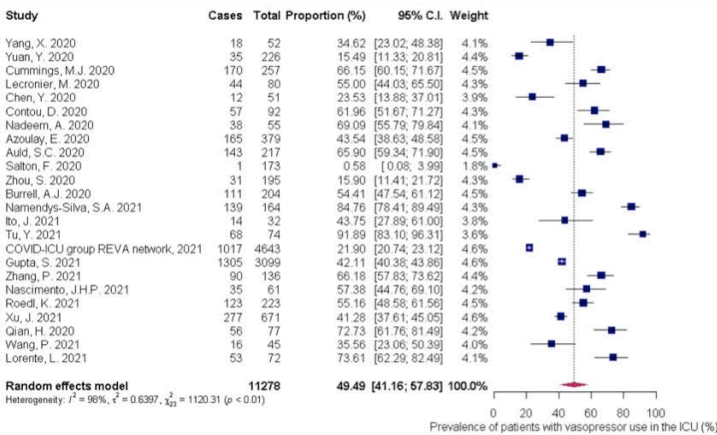

**D**

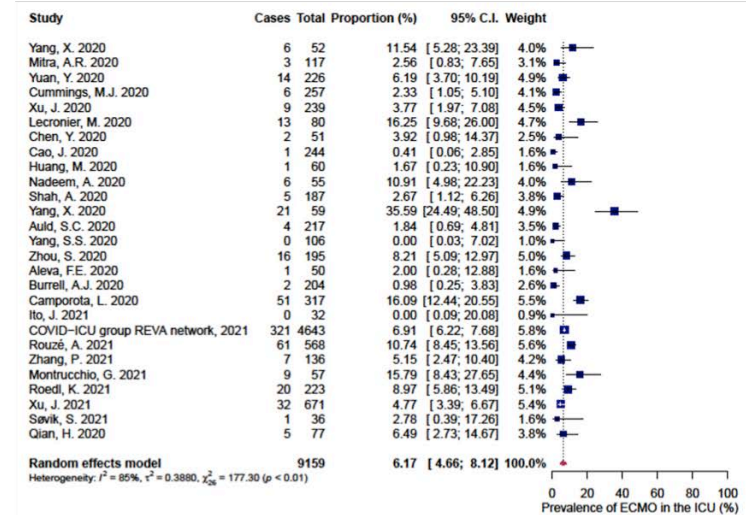

**Supplementary Figure 9.** Forest plot of admission in the Intensive Care Unit (ICU), among adult patients with COVID-19, initially hospitalized in the general ward. Egger's test for Funnel plot asymmetry was  $t = 2.850$ ,  $df = 55$ ,  $p = 0.006$ . Abbreviation: CI, confidence interval.

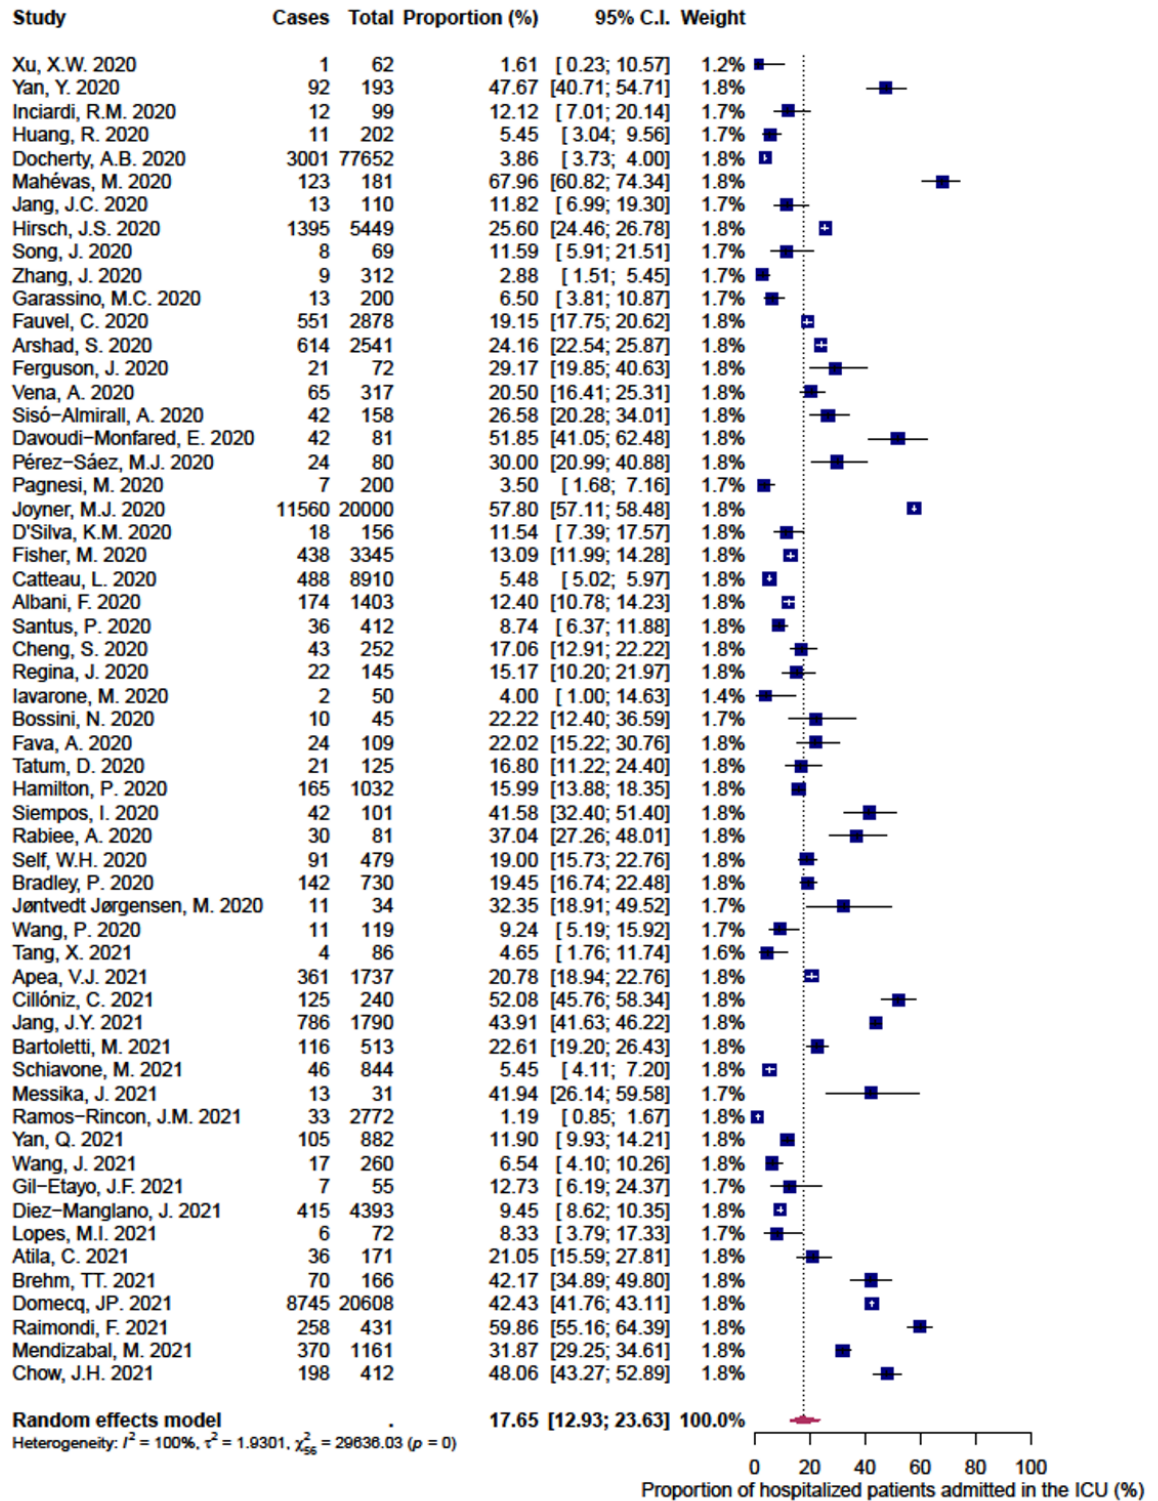

**Supplementary Figure 10.** Funnel plots of publication bias for studies estimating mortality A) in the Intensive Care Unit and B) among patients under Invasive mechanical ventilation. Egger's tests for asymmetry were  $t= 0.683$ ,  $df= 41$ ,  $p= 0.498$ ; and  $t= 0.338$ ,  $df= 24$ ,  $p= 0.739$ , respectively.

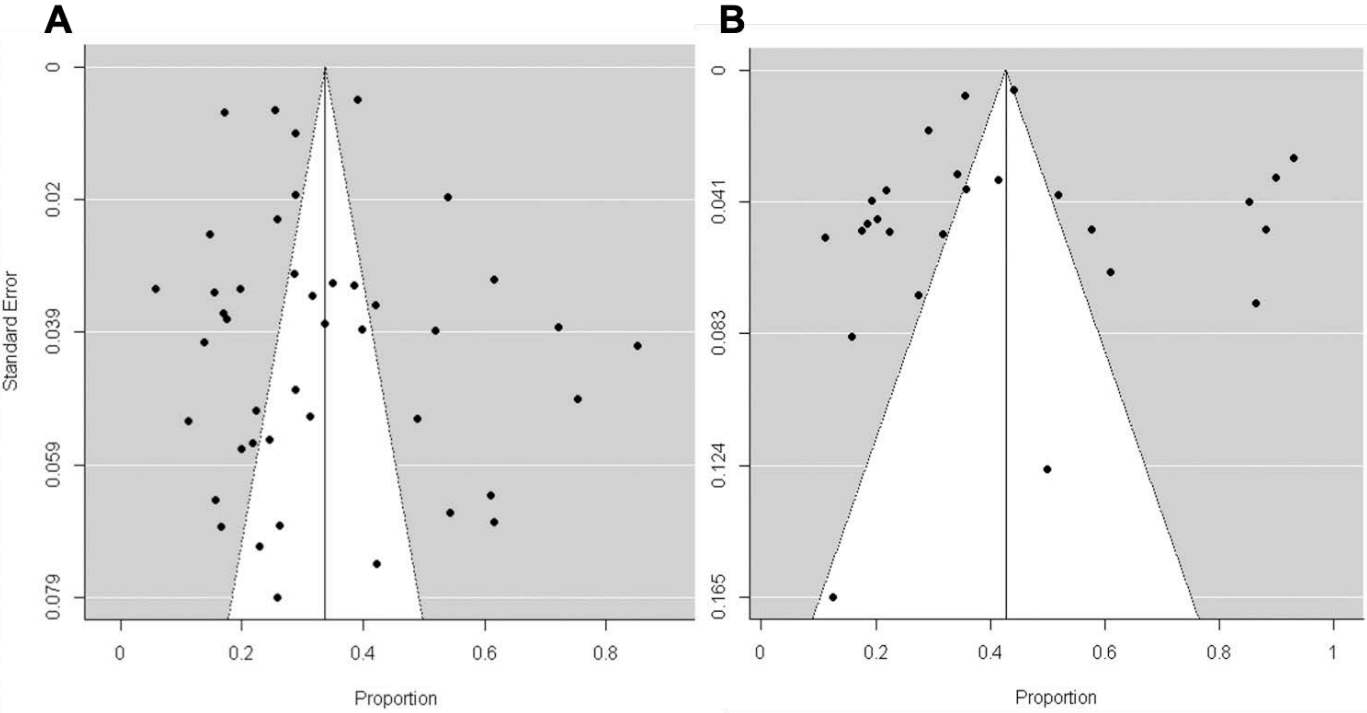

**Supplementary Figure 11.** Forest plot of COVID-19-related sepsis prevalence among hospitalized children A) in the Intensive Care Unit (ICU) and B) in the general ward. Abbreviation: CI, confidence interval. C) Funnel plot of publication bias for studies in the ICU and D) in general ward.

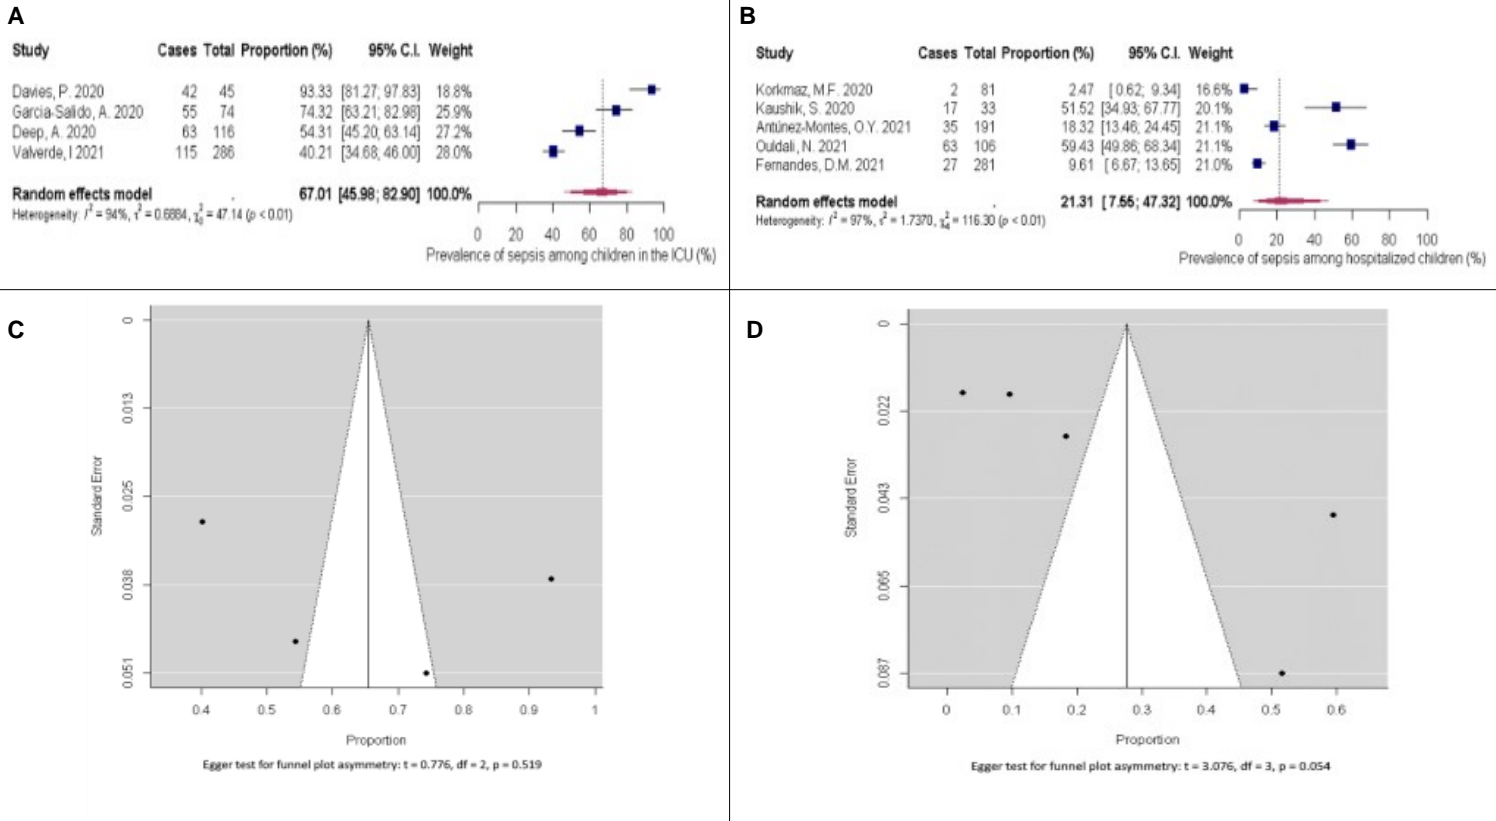

**Supplementary Figure 12.** A) Forest plot of mortality among children with COVID-19 hospitalized in the Intensive Care Unit (ICU) with B) respective Funnel plot of publication bias. Abbreviation: CI, confidence interval.

**A**

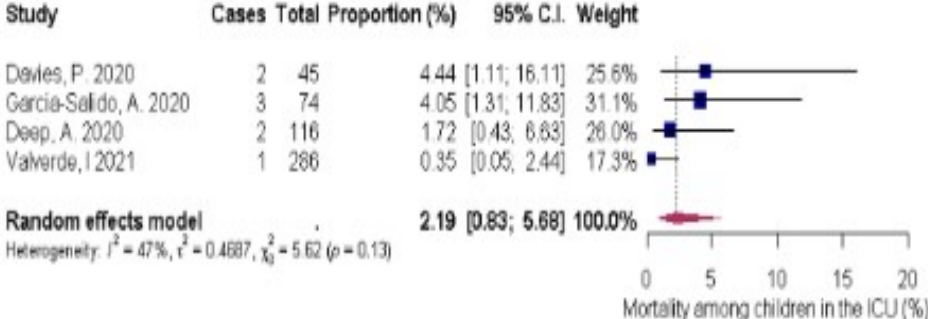

**B**

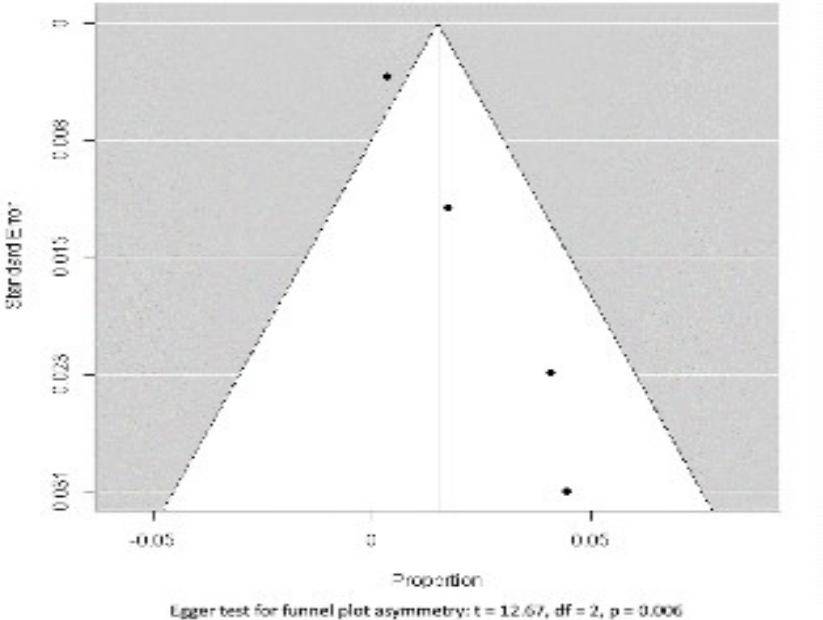



## Supplementary Tables

**Supplementary Table 1.** Characteristics of the included studies.

| Ref. | Author              | Study design                | Study period                | Country | N of patients | Incidence of sepsis (%) | Inclusion of consecutive patients | Level of uncertainty |
|------|---------------------|-----------------------------|-----------------------------|---------|---------------|-------------------------|-----------------------------------|----------------------|
| 19   | Xu, X.W. 2020       | Retrospective observational | December 2019-January 2020  | China   | 62            | 9.7                     | Yes-all comers                    | **                   |
| 20   | Yan, Y. 2020        | Retrospective observational | January 2020-February 20    | China   | 193           | 5.2                     | Yes-all comers                    | ***                  |
| 21   | Wang, K. 2020       | Retrospective observational | March 2020-April 2020       | China   | 548           | 37.8                    | Yes-all comers                    | ***                  |
| 22   | Yang, X. 2020       | Retrospective observational | December 2019-January 2020  | China   | 52            | 100.0                   | Critically ill                    | **                   |
| 23   | Inciardi, R.M. 2020 | Prospective                 | March 20                    | Italy   | 99            | 55.6                    | Yes-all comers                    | *                    |
| 24   | Mitra, A.R. 2020    | Retrospective observational | February 2020-April 2020    | Canada  | 117           | 86.3                    | Yes-all comers                    | *                    |
| 25   | Huang, R. 2020      | Retrospective observational | January 2020-February 2020  | China   | 202           | 4.5                     | Yes-all comers                    | ***                  |
| 26   | Docherty, A.B. 2020 | Retrospective observational | February 2020-April 2020    | UK      | 20133         | 21.5                    | Yes-all comers                    | *                    |
| 27   | Yuan, Y. 2020       | Retrospective observational | February 2020               | China   | 226           | 74.8                    | ICU                               | **                   |
| 28   | Mahévas, M. 2020    | Retrospective observational | March 2020                  | France  | 181           | 26.5                    | Yes-all comers                    | ***                  |
| 29   | Guo, T. 2020        | Observational               | January 2020-February 2020  | China   | 105           | 24.8                    | Elderly                           | ***                  |
| 30   | Feng, Y. 2020       | Observational               | January 2020-February 2020  | China   | 476           | 25.0                    | Yes-all comers                    | ***                  |
| 31   | Zhang, P. 2020      | Retrospective observational | December 2019-February 2020 | China   | 1128          | 11.3                    | Hypertension                      | ***                  |
| 32   | Yang, X. 2020       | Retrospective observational | December 2019-February 2020 | China   | 1476          | 20.7                    | Yes-all comers                    | ***                  |
| 33   | Cai, S.H. 2020      | RCT                         | January 2020-February 2020  | China   | 96            | 26.0                    | Yes-all comers                    | ***                  |
| 34   | Li, K. 2020         | Retrospective observational | January 2020-March 2020     | China   | 102           | 15.7                    | Yes-all comers                    | ***                  |
| 35   | Korkmaz, M.F. 2020  | Retrospective observational | March 2020-May 2020         | Turkey  | 81            | 2.5                     | Yes-all comers                    | **                   |
| 36   | Han, Y. 2020        | Retrospective observational | January 2020-February 2020  | China   | 107           | 50.5                    | Yes-all comers                    | **                   |
| 37   | Cui, X. 2020        | Retrospective observational | January 2020-March 2020     | China   | 116           | 56.0                    | Yes-all comers                    | **                   |
| 38   | Bolondi, G. 2020    | Observational               | March 2020-April 2020       | Italy   | 31            | 100.0                   | Yes-all comers                    | *                    |
| 39   | Cummings, M.J. 2020 | Retrospective observational | March 2020-April 2020       | USA     | 257           | 100.0                   | ICU                               | **                   |
| 40   | Lu, L. 2020         | Pragmatic trial             | January 2020-February 2020  | China   | 304           | 2.6                     | Yes-all comers                    | ***                  |

|    |                           |                             |                            |                                                                   |      |       |                  |     |
|----|---------------------------|-----------------------------|----------------------------|-------------------------------------------------------------------|------|-------|------------------|-----|
| 41 | Jang, J.C. 2020           | Retrospective observational | February 2020-March 2020   | South Korea                                                       | 110  | 16.4  | Yes-all comers   | *** |
| 42 | Li, L. 2020               | Retrospective observational | February 2020-April 2020   | China                                                             | 103  | 96.1  | Critically ill   | *** |
| 43 | Hirsch, J.S. 2020         | Retrospective observational | March 2020-April 2020      | USA                                                               | 5449 | 21.9  | Yes-all comers   | *** |
| 44 | Xu, J. 2020               | Retrospective observational | January 2020-February 2020 | China                                                             | 239  | 75.3  | Critically ill   | **  |
| 45 | Wu, J. 2020               | Retrospective observational | January 2020-February 2020 | China                                                             | 80   | 13.8  | Yes-all comers   | *** |
| 46 | Song, J. 2020             | Retrospective observational | January 2020-February 2020 | China                                                             | 69   | 5.8   | Yes-all comers   | *** |
| 47 | Zhang, J. 2020            | Retrospective observational | January 2020-March 2020    | China                                                             | 312  | 16.3  | Yes-all comers   | *** |
| 48 | Thomas, T. 2020           | Retrospective observational | Not reported               | USA                                                               | 33   | 54.5  | Yes-all comers   | *** |
| 49 | Garassino, M.C. 2020      | Observational               | March 2020-April2020       | Italy, Spain, France, Switzerland, Netherlands, USA, UK and China | 200  | 21.0  | Oncological      | *** |
| 50 | Lecronier, M. 2020        | Retrospective observational | March 2020-April2020       | France                                                            | 80   | 100.0 | ICU              | **  |
| 51 | Halvatsiotis, P. 2020     | Retrospective observational | March 2020-April2020       | Greece                                                            | 90   | 91.1  | ICU              | *** |
| 52 | Chen, Y. 2020             | Observational               | January 2020-March 2020    | China                                                             | 51   | 76.5  | Critically ill   | **  |
| 53 | Cao, J. 2020              | RCT                         | February 2020              | China                                                             | 244  | 62.7  | Yes-all comers   | *** |
| 54 | Guo, T. 2020              | Prospective observational   | January 2020-February 2020 | China                                                             | 187  | 24.6  | Yes-all comers   | *** |
| 55 | Fauvel, C. 2020           | Observational               | February 2020-April 2020   | France                                                            | 1240 | 36.0  | CTPA referral    | *** |
| 56 | Arshad, S. 2020           | Observational               | March 2020-May 2020        | USA                                                               | 2541 | 54.4  | Yes-all comers   | **  |
| 57 | Antinori, S. 2020         | Prospective observational   | February 2020-March 2020   | Italy                                                             | 35   | 100.0 | Ventilation      | *** |
| 58 | Ferguson, J. 2020         | Retrospective observational | March 2020-April 2020      | USA                                                               | 72   | 18.1  | Yes-all comers   | *** |
| 59 | Huang, M. 2020            | Prospective observational   | January 2020-April 2020    | China                                                             | 60   | 68.3  | Severe illness   | *** |
| 60 | Zou, X. 2020              | Retrospective observational | January 2020-February 2020 | China                                                             | 154  | 51.9  | Yes-all comers   | **  |
| 61 | Middeldorp, S. 2020       | Retrospective observational | April 2020                 | Netherlands                                                       | 123  | 16.3  | Yes-all comers   | *** |
| 62 | Vena, A. 2020             | RCT                         | February 2020-March 2020   | Italy                                                             | 317  | 62.8  | Yes-all comers   | *** |
| 63 | Mikulska, M. 2020         | Retrospective observational | Not reported               | Italy                                                             | 196  | 47.4  | Severe cases     | *** |
| 64 | Sisó-Almirall, A. 2020    | Prospective observational   | February 2020-April 2020   | Spain                                                             | 158  | 25.9  | Yes-all comers   | *** |
| 65 | Contou, D. 2020           | Retrospective observational | March 2020-April 2020      | France                                                            | 92   | 76.1  | ICU              | **  |
| 66 | Lei, F. 2020              | Observational               | December 2019-March 2020   | China                                                             | 5771 | 10.0  | Yes-all comers   | *** |
| 67 | Davoudi-Monfared, E. 2020 | Prospective observational   | February 2020-April 2020   | Iran                                                              | 81   | 75.3  | Severe illness   | *** |
| 68 | Nadeem, A. 2020           | Retrospective observational | March 2020-May 2020        | UAE                                                               | 55   | 74.5  | ICU              | **  |
| 69 | Pérez-Sáez, M.J. 2020     | Retrospective observational | March 2020-May 2020        | Spain                                                             | 80   | 21.3  | Renal transplant | *** |

|    |                        |                             |                          |             |       |       |                    |     |
|----|------------------------|-----------------------------|--------------------------|-------------|-------|-------|--------------------|-----|
| 70 | Lombardi, C.M. 2020    | Retrospective observational | March 2020-April 2020    | Italy       | 614   | 61.4  | Yes-all comers     | *** |
| 71 | Kox, M. 2020           | Retrospective observational | March 2020-April 2020    | Netherlands | 46    | 100.0 | ICU                | *   |
| 72 | Pagnesi, M. 2020       | Retrospective observational | Not reported             | Italy       | 200   | 36.0  | Yes-all comers     | *** |
| 73 | Azoulay, E. 2020       | Retrospective observational | February 2020-April 2020 | France      | 379   | 75.2  | ICU                | **  |
| 74 | Joyner, M.J. 2020      | Retrospective observational | April 2020-June 2020     | USA         | 20000 | 23.3  | Severe or critical | *** |
| 75 | Krause, M. 2020        | Retrospective observational | March 2020-April 2020    | USA         | 93    | 75.3  | ICU                | **  |
| 76 | Shah, A. 2020          | Retrospective observational | March 2020-May 2020      | UK          | 187   | 100.0 | ICU                | *** |
| 77 | Yang, X. 2020          | Prospective observational   | January 2020-March 2020  | China       | 59    | 76.3  | ICU                | **  |
| 78 | Auld, S.C. 2020        | Retrospective observational | March 2020-April 2020    | USA         | 217   | 75.1  | ICU                | **  |
| 79 | D'Silva, K.M. 2020     | Retrospective observational | January 2020-April 2020  | USA         | 156   | 27.6  | Rheumatologic      | *** |
| 80 | Kaushik, S. 2020       | Observational               | April 2020-May 2020      | USA         | 33    | 51.5  | MIS-C              | *** |
| 81 | Maquet, J. 2020        | Prospective observational   | March 2020-April 2020    | France      | 263   | 6.1   | Yes-all comers     | *   |
| 82 | Fisher, M. 2020        | Observational               | March 2020-April 2020    | USA         | 3345  | 28.7  | AKI                | *** |
| 83 | Dabies, P. 2020        | Retrospective observational | April 2020-May 2020      | UK          | 45    | 93.3  | PICU               | **  |
| 84 | Catteau, L. 2020       | RCT                         | March 2020-May 2020      | Belgium     | 8910  | 20.6  | Yes-all comers     | *** |
| 85 | Poggiali, E. 2020      | Prospective observational   | February 2020-March 2020 | Italy       | 123   | 69.1  | Yes-all comers     | *** |
| 86 | Della-Torre, E. 2020   | Prospective observational   | Not reported             | Italy       | 56    | 100.0 | Severe illness     | *** |
| 87 | Dequin, P.F. 2020      | Retrospective observational | March 2020-June2020      | France      | 146   | 75.3  | ICU                | **  |
| 88 | Ferrando, C. 2020      | Retrospective observational | March 2020-June2020      | Spain       | 199   | 75.4  | ICU                | **  |
| 89 | Salton, F. 2020        | Prospective observational   | February 2020-April 2020 | Italy       | 173   | 75.1  | ICU                | **  |
| 90 | Albani, F. 2020        | Prospective observational   | February 2020-May2020    | Italy       | 1403  | 64.2  | Yes-all comers     | *** |
| 91 | Santus, P. 2020        | Prospective observational   | March 2020-May 2020      | Italy       | 412   | 61.9  | Yes-all comers     | *** |
| 92 | Cheng, S. 2020         | Observational               | January 2020-March 2020  | China       | 252   | 25.0  | Yes-all comers     | **  |
| 93 | Annane, D. 2020        | Retrospective observational | March 2020-May 2020      | France      | 80    | 85.0  | Severe illness     | **  |
| 94 | Regina, J. 2020        | Prospective observational   | March 2020               | Switzerland | 145   | 15.9  | Yes-all comers     | **  |
| 95 | Yang, S.S. 2020        | Retrospective observational | March 2020-May 2020      | Canada      | 106   | 75.5  | ICU                | **  |
| 96 | Madonado, V. 2020      | Prospective observational   | July 2020-August 2020    | Mexico      | 38    | 76.3  | Yes-all comers     | **  |
| 97 | Ferrari, D. 2020       | Retrospective observational | February 2020-April 2020 | Italy       | 198   | 74.7  | Yes-all comers     | *** |
| 98 | Garcia-Salido, A. 2020 | Retrospective observational | March 2020-June 2020     | Spain       | 74    | 74.3  | PICU               | **  |
| 99 | Iavarone, M. 2020      | Retrospective observational | March 2020               | Italy       | 50    | 52.0  | Cirrhosis          | *** |

|     |                             |                                 |                             |             |      |      |                  |     |
|-----|-----------------------------|---------------------------------|-----------------------------|-------------|------|------|------------------|-----|
| 100 | Bossini, N. 2020            | Prospective observational       | March 2020-April 2020       | Italy       | 45   | 60.0 | Renal transplant | *** |
| 101 | Renieris, G. 2020           | Observational                   | March 2020                  | Greece      | 74   | 71.6 | Yes-all comers   | *   |
| 102 | Fava, A. 2020               | Real-time internet-based survey | March 2020-April 2020       | Spain       | 109  | 53.2 | Renal transplant | *** |
| 103 | Tatum, D. 2020              | Retrospective observational     | Not reported                | USA         | 125  | 26.4 | Yes-all comers   | *** |
| 104 | Zhou, S. 2020               | Retrospective observational     | January 2020-April 2020     | China       | 195  | 74.9 | ICU              | **  |
| 105 | Hamilton, P. 2020           | Retrospective observational     | 1March 2020-April 2020      | UK          | 1032 | 13.1 | Yes-all comers   | *** |
| 106 | Wu, M. 2020                 | Prospective observational       | December 2019-March 2020    | China       | 334  | 72.8 | Severe cases     | *   |
| 107 | Jiang, Y. 2020              | Retrospective observational     | January 2020-March 2020     | China       | 281  | 75.1 | ICU              | **  |
| 108 | Liang, M. 2020              | Prospective observational       | January 2020-March 2020     | China       | 154  | 24.0 | Yes-all comers   | *** |
| 109 | Siempos, I. 2020            | Retrospective observational     | March 11 and April 15, 2020 | Greece      | 101  | 41.6 | Yes-all comers   | *** |
| 110 | Aleva, F.E. 2020            | Observational                   | March 2020-April 2020       | Netherlands | 50   | 98.0 | Critically ill   | **  |
| 111 | Burrell, A.J. 2020          | Retrospective observational     | February 2020-June 2020     | Australia   | 204  | 75.0 | ICU              | **  |
| 112 | Galiero, R. 2020            | Retrospective observational     | March 2020-July 2020        | Italy       | 618  | 36.4 | Yes-all comers   | *** |
| 113 | Stefan, G. 2020             | Retrospective observational     | March 2020-May 2020         | Romania     | 37   | 13.5 | Hemodialysis     | *** |
| 114 | Rabiee, A. 2020             | Observational                   | before May 2020             | US          | 81   | 49.4 | Liver transplant | *** |
| 115 | Vassiliou, A.G. 2020        | Retrospective observational     | 22 March to 3 August 2020   | Greece      | 30   | 90.0 | ICU              | **  |
| 116 | Deep, A. 2020               | Prospective observational       | March 2020-May 2020         | UK          | 116  | 54.3 | MIS-C            | *** |
| 117 | Camporota, L. 2020          | Prospective observational       | March 2020-May 2020         | UK          | 317  | 67.2 | ICU              | *** |
| 118 | Self, W.H. 2020             | Retrospective observational     | April 2020-June 2020        | USA         | 479  | 72.2 | Yes-all comers   | *   |
| 119 | Bradley, P. 2020            | Prospective observational       | April 2020                  | UK          | 730  | 18.4 | Yes-all comers   | **  |
| 120 | Jøntvedt Jørgensen, M. 2020 | RCT                             | March 2020-April 2020       | Norway      | 34   | 61.8 | Yes-all comers   | *** |
| 121 | Tomasoni, D. 2020           | Observational                   | March 2020-April 2020       | Italy       | 692  | 28.3 | Yes-all comers   | **  |
| 122 | Wang, P. 2020               | Retrospective observational     | January 2020-April 2020     | China       | 119  | 25.2 | Yes-all comers   | **  |
| 123 | Namendys-Silva, S.A. 2021   | Retrospective observational     | April 2020                  | Mexico      | 164  | 75.0 | ICU              | **  |
| 124 | Tang, X. 2021               | Prospective observational       | February 2020-March 2020    | China       | 86   | 47.7 | Yes-all comers   | *** |
| 125 | Apea, V.J. 2021             | Retrospective observational     | January 2020- May 2020      | UK          | 1737 | 15.4 | Yes-all comers   | *** |
| 126 | Ferrando-Vivas, P. 2021     | Prospective observational       | March 2020-June 2020        | UK          | 9900 | 75.0 | ICU              | *** |
| 127 | Cillóniz, C. 2021           | RCT                             | February 2020-April 2020    | Spain       | 240  | 50.0 | Yes-all comers   | *** |

|     |                                    |                                         |                            |                                            |      |       |                 |     |
|-----|------------------------------------|-----------------------------------------|----------------------------|--------------------------------------------|------|-------|-----------------|-----|
| 128 | Kooistra, E.J. 2021                | Retrospective observational             | March 2020-April 2020      | Netherlands                                | 67   | 76.1  | ICU             | **  |
| 129 | Ito, J. 2021                       | Cross-sectional observational           | March 2020-June2020        | Japan                                      | 32   | 100.0 | ICU             | *   |
| 130 | Radovanovic, D. 2021               | Retrospective observational             | March 2020-November 2020   | Italy                                      | 147  | 68.7  | ICU             | *** |
| 131 | Jang, J.Y. 2021                    | Retrospective observational             | April 2020-June2020        | USA                                        | 1790 | 26.8  | Yes-all comers  | *** |
| 132 | Bonazzetti, C. 2021                | Retrospective observational             | February 2020-April 2020   | Italy                                      | 89   | 75.3  | ICU             | **  |
| 133 | Tu, Y. 2021                        | Prospective observational               | January 2020-February 2020 | China                                      | 74   | 100.0 | ICU             | *   |
| 134 | COVID-ICU group REVA network, 2021 | Observational                           | February 2020-May 2020     | France, Belgium, Switzerland               | 4643 | 75.0  | ICU             | *** |
| 135 | Gupta, S. 2021                     | Prospective observational               | March 2020-April 2020      | USA                                        | 3099 | 75.0  | ICU             | *** |
| 136 | Valverde, I 2021                   | Retrospective observational             | February 2020-June 2020    | 17 European Countries                      | 286  | 40.2  | MIS-C           | *** |
| 137 | Bartoletti, M. 2021                | Observational                           | February 2020-June 2020    | Italy                                      | 513  | 75.0  | Yes-all comers  | **  |
| 138 | Schiavone, M. 2021                 | Retrospective observational             | February 2020-April 2020   | Italy                                      | 844  | 21.7  | Yes-all comers  | *** |
| 139 | Messika, J. 2021                   | Retrospective observational             | March 2020-May 2020        | France                                     | 31   | 58.1  | Lung transplant | *** |
| 140 | Pun, B.T. 2021                     | Retrospective observational             | January 2020-April 2020    | Europe, America, Africa                    | 2088 | 97.9  | ICU             | *** |
| 141 | Rouzé, A. 2021                     | Retrospective observational             | April 2020-May 2020        | France, Spain, Greece, Portugal, Ireland   | 568  | 75.0  | ICU             | **  |
| 142 | Antúnez-Montes, O.Y. 2021          | Prospective Retrospective observational | July 2020-August 2020      | Mexico, Colombia, Peru, Costa Rica, Brazil | 191  | 18.3  | Yes-all comers  | *** |
| 143 | Zhang, P. 2021                     | Retrospective observational             | January 2020-February 2020 | China                                      | 136  | 75.0  | ICU             | **  |
| 144 | Ramos-Rincon, J.M. 2021            | Retrospective observational             | March 2020-May 2020        | Spain                                      | 2772 | 18.7  | >80 years old   | *   |
| 145 | Nascimento, J.H.P. 2021            | Retrospective observational             | March 2020-April 2020      | Brazil                                     | 61   | 60.7  | ICU             | *** |
| 146 | Ouldali, N. 2021                   | Retrospective observational             | April 2020-January 2021    | France                                     | 106  | 59.4  | MISC            | *** |
| 147 | Zhang, W. 2021                     | Retrospective observational             | January 2020-February 2020 | China                                      | 158  | 75.3  | ICU             | **  |
| 148 | Piowarczyk, P. 2021                | Observational                           | March 2020-May 2020        | Poland                                     | 60   | 36.7  | Yes-all comers  | *** |
| 149 | Yan, Q. 2021                       | Observational                           | January 2020-February 2020 | China                                      | 882  | 29.7  | >65 years old   | *** |
| 150 | Wang, J. 2021                      | Retrospective observational             | January 2020-February 2020 | China                                      | 260  | 30.4  | Yes-all comers  | *** |
| 151 | Gil-Etayo, J.F. 2021               | Retrospective observational             | Not reported               | Spain                                      | 55   | 36.4  | Yes-all comers  | *** |
| 152 | Diez-Manglano, J. 2021             | RCT                                     | March 2020-May 22 2020     | Spain                                      | 4393 | 22.8  | Yes-all comers  | *** |
| 153 | Montrucchio, G. 2021               | Retrospective observational             | March 2020-April 2020      | Italy                                      | 57   | 75.4  | ICU             | **  |

|     |                      |                                |                             |                                                                                                                |       |       |                |     |
|-----|----------------------|--------------------------------|-----------------------------|----------------------------------------------------------------------------------------------------------------|-------|-------|----------------|-----|
| 154 | Lopes, M.I. 2021     | Retrospective observational    | April 2020-August 2020      | Brazil                                                                                                         | 72    | 50.0  | Yes-all comers | **  |
| 155 | Roedl, K. 2021       | Retrospective observational    | February 2020-June 2020     | Germany                                                                                                        | 223   | 74.9  | ICU            | **  |
| 156 | Xu, J. 2021          | Observational, cross-sectional | January 2020-February 2020  | China                                                                                                          | 671   | 75.0  | ICU            | **  |
| 157 | Søvik, S. 2021       | Retrospective observational    | March 2020-May 2020         | Norway                                                                                                         | 36    | 100.0 | ICU            | *** |
| 158 | Qian, H. 2020        | Observational                  | February 2020-March 2020    | China                                                                                                          | 77    | 75.3  | Critically ill | **  |
| 159 | Atila, C. 2021       | Retrospective observational    | March 2020-July 2020        | Switzerland                                                                                                    | 171   | 12.9  | Yes-all comers | *** |
| 160 | Balcells, ME. 2021   | Retrospective observational    | May 2020-July 2020          | Chile                                                                                                          | 58    | 75.9  | Yes-all comers | **  |
| 161 | Brehm, TT. 2021      | Retrospective observational    | February 2020-June 2020     | Germany                                                                                                        | 166   | 33.7  | Yes-all comers | *** |
| 162 | Domecq, JP. 2021     | Observational                  | February 2020-November 2020 | USA                                                                                                            | 20608 | 50.0  | Yes-all comers | **  |
| 163 | Raimondi, F. 2021    | Observational                  | February 2020-March 2020    | Italy                                                                                                          | 431   | 51.3  | Yes-all comers | *** |
| 164 | Wang, P. 2021        | Retrospective observational    | January 2020-March 2020     | China                                                                                                          | 45    | 75.6  | ICU            | *** |
| 165 | Lorente, L. 2021     | Retrospective observational    | Not reported                | Spain                                                                                                          | 72    | 86.1  | ICU            | *** |
| 166 | Fernandes, D.M. 2021 | Observational                  | March 2020-May 2020         | USA                                                                                                            | 281   | 9.6   | Yes-all comers | *** |
|     |                      |                                |                             | Argentina, Brazil, Chile, Colombia, Dominican Republic, Ecuador, Guatemala, Mexico, Paraguay, Peru and Uruguay |       |       |                |     |
| 167 | Mendizabal, M. 2021  | Retrospective observational    | April 2020-July 2020        |                                                                                                                | 1161  | 25.9  | Yes-all comers | *** |
| 168 | Doidge, J.C. 2021    | Retrospective observational    | February 2020-July 2020     | UK                                                                                                             | 10741 | 79.6  | ICU            | *** |
| 169 | Chow, J.H. 2021      | Observational                  | March 2020-July 2020        | USA                                                                                                            | 412   | 75.0  | Yes-all comers | **  |

Abbreviations: AKI Acute Kidney Injury; CTPA Computed Tomography-Pulmonary Angiogram; ICU Intensive Care Unit; MIS Multisystem Inflammatory Syndrome; PICU Pediatric Intensive Care Unit; RCT Randomized Clinical Trial.

Level of Uncertainty: \* zero – contacted authors provided the exact proportion of patients with sepsis-3 based on Sequential Organ Failure Assessment (SOFA) score; \*\* low – SOFA score was provided in articles as median with respective interquartile range; \*\*\*intermediate/high – proportion of patients with sepsis was extracted by the highest proportion of patients with a specific organ dysfunction raising SOFA score  $\geq 2$  points.

**Supplementary Table 2.** Risk assessment of included studies according to Newcastle-Ottawa Quality Assessment Scale.

| Ref. | Selection                                |                                     |                           | Comparability                                                         |                                                                 | Outcome               |                                                 |                                  | Total |
|------|------------------------------------------|-------------------------------------|---------------------------|-----------------------------------------------------------------------|-----------------------------------------------------------------|-----------------------|-------------------------------------------------|----------------------------------|-------|
|      | Representativeness of the exposed cohort | Selection of the non-exposed cohort | Ascertainment of exposure | Demonstration that outcome of interest was not present at study start | Comparability of cohorts on the basis of the design or analysis | Assessment of outcome | Was follow-up long enough for outcomes to occur | Adequacy of follow up of cohorts |       |
| 19   | *                                        | NA                                  | *                         | *                                                                     | NA                                                              | *                     | *                                               | *                                | 6     |
| 20   | *                                        | NA                                  | *                         | *                                                                     | NA                                                              | *                     | *                                               | *                                | 6     |
| 21   | *                                        | NA                                  | *                         | *                                                                     | NA                                                              | *                     | *                                               | *                                | 6     |
| 22   |                                          | NA                                  | *                         | *                                                                     | NA                                                              | *                     | *                                               | *                                | 5     |
| 23   | *                                        | NA                                  | *                         | *                                                                     | NA                                                              | *                     | *                                               | *                                | 6     |
| 24   | *                                        | NA                                  | *                         | *                                                                     | NA                                                              | *                     | *                                               | *                                | 6     |
| 25   | *                                        | NA                                  | *                         | *                                                                     | NA                                                              | *                     | *                                               | *                                | 6     |
| 26   | *                                        | NA                                  | *                         | *                                                                     | NA                                                              | *                     | *                                               | *                                | 6     |
| 27   | *                                        | NA                                  | *                         | *                                                                     | NA                                                              | *                     | *                                               | *                                | 6     |
| 28   | *                                        | NA                                  | *                         | *                                                                     | NA                                                              | *                     | *                                               | *                                | 6     |
| 29   |                                          | NA                                  | *                         | *                                                                     | NA                                                              | *                     | *                                               | *                                | 5     |
| 30   | *                                        | NA                                  | *                         | *                                                                     | NA                                                              | *                     | *                                               | *                                | 6     |
| 31   |                                          | NA                                  | *                         | *                                                                     | NA                                                              | *                     | *                                               | *                                | 5     |
| 32   | *                                        | NA                                  | *                         | *                                                                     | NA                                                              | *                     | *                                               | *                                | 6     |
| 33   | *                                        | NA                                  | *                         | *                                                                     | NA                                                              | *                     | *                                               | *                                | 6     |
| 34   | *                                        | NA                                  | *                         | *                                                                     | NA                                                              | *                     | *                                               | *                                | 6     |
| 35   | *                                        | NA                                  | *                         | *                                                                     | NA                                                              | *                     | *                                               | *                                | 6     |
| 36   | *                                        | NA                                  | *                         | *                                                                     | NA                                                              | *                     | *                                               | *                                | 6     |
| 37   | *                                        | NA                                  | *                         | *                                                                     | NA                                                              | *                     | *                                               | *                                | 6     |
| 38   | *                                        | NA                                  | *                         | *                                                                     | NA                                                              | *                     | *                                               | *                                | 6     |
| 39   | *                                        | NA                                  | *                         | *                                                                     | NA                                                              | *                     | *                                               | *                                | 6     |
| 40   | *                                        | NA                                  | *                         | *                                                                     | NA                                                              | *                     | *                                               | *                                | 6     |
| 41   | *                                        | NA                                  | *                         | *                                                                     | NA                                                              | *                     | *                                               | *                                | 6     |
| 42   |                                          | NA                                  | *                         | *                                                                     | NA                                                              | *                     | *                                               | *                                | 5     |
| 43   | *                                        | NA                                  | *                         | *                                                                     | NA                                                              | *                     | *                                               | *                                | 6     |
| 44   |                                          | NA                                  | *                         | *                                                                     | NA                                                              | *                     | *                                               | *                                | 5     |
| 45   | *                                        | NA                                  | *                         | *                                                                     | NA                                                              | *                     | *                                               | *                                | 6     |
| 46   | *                                        | NA                                  | *                         | *                                                                     | NA                                                              | *                     | *                                               | *                                | 6     |
| 47   | *                                        | NA                                  | *                         | *                                                                     | NA                                                              | *                     | *                                               | *                                | 6     |
| 48   | *                                        | NA                                  | *                         | *                                                                     | NA                                                              | *                     | *                                               | *                                | 6     |
| 49   |                                          | NA                                  | *                         | *                                                                     | NA                                                              | *                     | *                                               | *                                | 5     |
| 50   | *                                        | NA                                  | *                         | *                                                                     | NA                                                              | *                     | *                                               | *                                | 5     |
| 51   | *                                        | NA                                  | *                         | *                                                                     | NA                                                              | *                     | *                                               | *                                | 6     |

|    |   |    |   |   |    |   |   |   |   |
|----|---|----|---|---|----|---|---|---|---|
| 52 |   | NA | * | * | NA | * | * | * | 5 |
| 53 | * | NA | * | * | NA | * | * | * | 6 |
| 54 | * | NA | * | * | NA | * | * | * | 6 |
| 55 |   | NA | * | * | NA | * | * | * | 5 |
| 56 | * | NA | * | * | NA | * | * | * | 6 |
| 57 |   | NA | * |   | NA | * | * | * | 4 |
| 58 | * | NA | * | * | NA | * | * | * | 6 |
| 59 |   | NA | * | * | NA | * | * | * | 5 |
| 60 | * | NA | * | * | NA | * | * | * | 6 |
| 61 | * | NA | * | * | NA | * | * | * | 6 |
| 62 | * | NA | * | * | NA | * | * | * | 6 |
| 63 |   | NA | * | * | NA | * | * | * | 5 |
| 64 | * | NA | * | * | NA | * | * | * | 6 |
| 65 | * | NA | * | * | NA | * | * | * | 6 |
| 66 | * | NA | * | * | NA | * | * | * | 6 |
| 67 |   | NA | * | * | NA | * | * | * | 5 |
| 68 | * | NA | * | * | NA | * | * | * | 6 |
| 69 |   | NA | * | * | NA | * | * | * | 5 |
| 70 | * | NA | * | * | NA | * | * | * | 6 |
| 71 | * | NA | * |   | NA | * | * | * | 5 |
| 72 | * | NA | * | * | NA | * | * | * | 6 |
| 73 | * | NA | * | * | NA | * | * | * | 6 |
| 74 |   | NA | * | * | NA | * | * | * | 5 |
| 75 | * | NA | * |   | NA | * | * | * | 5 |
| 76 | * | NA | * | * | NA | * | * | * | 6 |
| 77 | * | NA | * |   | NA | * | * | * | 5 |
| 78 | * | NA | * | * | NA | * | * | * | 6 |
| 79 |   | NA | * | * | NA | * | * | * | 5 |
| 80 |   | NA | * |   | NA | * | * | * | 4 |
| 81 | * | NA | * | * | NA | * | * | * | 6 |
| 82 |   | NA | * |   | NA | * | * | * | 4 |
| 83 |   | NA | * | * | NA | * | * | * | 5 |
| 84 | * | NA | * | * | NA | * | * | * | 6 |
| 85 | * | NA | * | * | NA | * | * | * | 6 |
| 86 |   | NA | * | * | NA | * | * | * | 5 |
| 87 | * | NA | * | * | NA | * | * | * | 6 |
| 88 | * | NA | * | * | NA | * | * | * | 6 |
| 89 | * | NA | * | * | NA | * | * | * | 6 |
| 90 | * | NA | * | * | NA | * | * | * | 6 |



|     |   |    |   |   |    |   |   |   |   |
|-----|---|----|---|---|----|---|---|---|---|
| 91  | * | NA | * | * | NA | * | * | * | 6 |
| 92  | * | NA | * | * | NA | * | * | * | 6 |
| 93  |   | NA | * | * | NA | * | * | * | 5 |
| 94  | * | NA | * | * | NA | * | * | * | 6 |
| 95  | * | NA | * | * | NA | * | * | * | 6 |
| 96  | * | NA | * | * | NA | * | * | * | 6 |
| 97  | * | NA | * | * | NA | * | * | * | 6 |
| 98  |   | NA | * | * | NA | * | * | * | 5 |
| 99  |   | NA | * | * | NA | * | * | * | 5 |
| 100 |   | NA | * | * | NA | * | * | * | 5 |
| 101 | * | NA | * | * | NA | * | * | * | 6 |
| 102 |   | NA | * | * | NA | * | * | * | 5 |
| 103 | * | NA | * | * | NA | * | * | * | 6 |
| 104 | * | NA | * | * | NA | * | * | * | 6 |
| 105 | * | NA | * | * | NA | * | * | * | 6 |
| 106 |   | NA | * | * | NA | * | * | * | 5 |
| 107 | * | NA | * | * | NA | * | * | * | 6 |
| 108 | * | NA | * | * | NA | * | * | * | 6 |
| 109 | * | NA | * | * | NA | * | * | * | 6 |
| 110 |   | NA | * | * | NA | * | * | * | 5 |
| 111 | * | NA | * | * | NA | * | * | * | 6 |
| 112 | * | NA | * | * | NA | * | * | * | 6 |
| 113 |   | NA | * | * | NA | * | * | * | 5 |
| 114 |   | NA | * | * | NA | * | * | * | 5 |
| 115 | * | NA | * | * | NA | * | * | * | 6 |
| 116 |   | NA | * | * | NA | * | * | * | 4 |
| 117 | * | NA | * | * | NA | * | * | * | 6 |
| 118 | * | NA | * | * | NA | * | * | * | 5 |
| 119 | * | NA | * | * | NA | * | * | * | 6 |
| 120 |   | NA | * | * | NA | * | * | * | 5 |
| 121 | * | NA | * | * | NA | * | * | * | 1 |
| 122 | * | NA | * | * | NA | * | * | * | 6 |
| 123 | * | NA | * | * | NA | * | * | * | 6 |
| 124 | * | NA | * | * | NA | * | * | * | 6 |
| 125 | * | NA | * | * | NA | * | * | * | 6 |
| 126 | * | NA | * | * | NA | * | * | * | 6 |
| 127 | * | NA | * | * | NA | * | * | * | 6 |
| 128 | * | NA | * | * | NA | * | * | * | 6 |
| 129 | * | NA | * | * | NA | * | * | * | 6 |

|     |   |    |   |   |    |   |   |   |   |
|-----|---|----|---|---|----|---|---|---|---|
| 130 | * | NA | * | * | NA | * | * | * | 6 |
| 131 | * | NA | * | * | NA | * | * | * | 6 |
| 132 | * | NA | * | * | NA | * | * | * | 6 |
| 133 | * | NA | * | * | NA | * | * | * | 6 |
| 134 | * | NA | * | * | NA | * | * | * | 6 |
| 135 | * | NA | * | * | NA | * | * | * | 6 |
| 136 |   | NA | * | * | NA | * | * | * | 6 |
| 137 | * | NA | * | * | NA | * | * | * | 5 |
| 138 | * | NA | * | * | NA | * | * | * | 6 |
| 139 |   | NA | * | * | NA | * | * | * | 6 |
| 140 | * | NA | * | * | NA | * | * | * | 5 |
| 141 | * | NA | * | * | NA | * | * | * | 6 |
| 142 | * | NA | * | * | NA | * | * | * | 6 |
| 143 | * | NA | * | * | NA | * | * | * | 6 |
| 144 |   | NA | * | * | NA | * | * | * | 6 |
| 145 | * | NA | * | * | NA | * | * | * | 5 |
| 146 |   | NA | * |   | NA | * | * | * | 6 |
| 147 | * | NA | * | * | NA | * | * | * | 4 |
| 148 | * | NA | * | * | NA | * | * | * | 6 |
| 149 |   | NA | * | * | NA | * | * | * | 6 |
| 150 | * | NA | * | * | NA | * | * | * | 5 |
| 151 | * | NA | * | * | NA | * | * | * | 6 |
| 152 | * | NA | * | * | NA | * | * | * | 6 |
| 153 | * | NA | * | * | NA | * | * | * | 6 |
| 154 | * | NA | * | * | NA | * | * | * | 6 |
| 155 | * | NA | * | * | NA | * | * | * | 6 |
| 156 | * | NA | * | * | NA | * | * | * | 6 |
| 157 | * | NA | * |   | NA | * | * | * | 6 |
| 158 |   | NA | * | * | NA | * | * | * | 5 |
| 159 | * | NA | * | * | NA | * | * | * | 5 |
| 160 | * | NA | * | * | NA | * | * | * | 6 |
| 161 | * | NA | * | * | NA | * | * | * | 6 |
| 162 | * | NA | * | * | NA | * | * | * | 6 |
| 163 | * | NA | * | * | NA | * | * | * | 6 |
| 164 | * | NA | * | * | NA | * | * | * | 6 |
| 165 | * | NA | * | * | NA | * | * | * | 6 |
| 166 | * | NA | * | * | NA | * | * | * | 6 |
| 167 | * | NA | * | * | NA | * | * | * | 6 |
| 168 | * | NA | * | * | NA | * | * | * | 6 |

**Selection**

Representativeness of the exposed cohort (\* for a and b) a) truly representative of the average in the community; b) somewhat representative of the average in the community; c) selected group of users eg nurses, volunteers; d) no description of the derivation of the cohort

Selection of the non-exposed cohort (\* for a) a) drawn from the same community as the exposed cohort; b) drawn from a different source; c) no description of the derivation of the non-exposed cohort

Ascertainment of exposure (\* for a and b) a) secure record (eg surgical records); b) structured interview; c) written self-report; d) no description

Demonstration that outcome of interest was not present at start of study (\* for a) a) yes; b) no

**Comparability**

Comparability of cohorts on the basis of the design or analysis a) study controls for the most important factor \*\*; b) study controls for any additional factor\*

**Outcome**

Assessment of outcome (\* for a and b) a) independent blind assessment; b) record linkage; c) self report; d) no description

Was follow-up long enough for outcomes to occur (\* for a) a) yes; b) no

Adequacy of follow up of cohorts (\* for a and b) a) complete follow up - all subjects accounted for; b) subjects lost to follow up unlikely to introduce bias - small number lost; c) follow up rate large and no description of those lost; d) no statement

Abbreviations: NA, non-applicable

**Supplementary Table 3.** Risk assessment of included studies according to MINORS.

| Ref. | Clearly stated aim | Inclusion of consecutive patients | Prospective data collection | Endpoints appropriate to study aim | Unbiased assessment of study endpoint | Follow-up period appropriate to study aim | <5% lost to follow-up | Prospective calculation of study size | Total (out of 16) |
|------|--------------------|-----------------------------------|-----------------------------|------------------------------------|---------------------------------------|-------------------------------------------|-----------------------|---------------------------------------|-------------------|
| 19   | 2                  | 2                                 | 1                           | 2                                  | 2                                     | 2                                         | 2                     | NA                                    | 13                |
| 20   | 2                  | 2                                 | 1                           | 1                                  | 1                                     | 2                                         | 2                     | NA                                    | 11                |
| 21   | 2                  | 2                                 | 1                           | 1                                  | 1                                     | 2                                         | 2                     | NA                                    | 11                |
| 22   | 2                  | 0                                 | 1                           | 2                                  | 2                                     | 2                                         | 2                     | NA                                    | 11                |
| 23   | 2                  | 2                                 | 2                           | 2                                  | 2                                     | 2                                         | 2                     | NA                                    | 14                |
| 24   | 2                  | 2                                 | 1                           | 2                                  | 2                                     | 2                                         | 2                     | NA                                    | 13                |
| 25   | 2                  | 2                                 | 1                           | 1                                  | 1                                     | 2                                         | 2                     | NA                                    | 11                |
| 26   | 2                  | 2                                 | 1                           | 2                                  | 2                                     | 2                                         | 2                     | NA                                    | 13                |
| 27   | 2                  | 2                                 | 1                           | 2                                  | 2                                     | 2                                         | 2                     | NA                                    | 13                |
| 28   | 2                  | 2                                 | 1                           | 1                                  | 1                                     | 2                                         | 2                     | NA                                    | 11                |
| 29   | 2                  | 1                                 | 0                           | 1                                  | 1                                     | 2                                         | 2                     | NA                                    | 9                 |
| 30   | 2                  | 2                                 | 0                           | 1                                  | 1                                     | 2                                         | 2                     | NA                                    | 10                |
| 31   | 2                  | 1                                 | 1                           | 1                                  | 1                                     | 2                                         | 2                     | NA                                    | 10                |
| 32   | 2                  | 2                                 | 1                           | 1                                  | 1                                     | 2                                         | 2                     | NA                                    | 11                |
| 33   | 2                  | 2                                 | 2                           | 1                                  | 1                                     | 2                                         | 2                     | NA                                    | 12                |
| 34   | 2                  | 2                                 | 1                           | 1                                  | 1                                     | 2                                         | 2                     | NA                                    | 11                |
| 35   | 2                  | 2                                 | 1                           | 2                                  | 2                                     | 2                                         | 2                     | NA                                    | 13                |
| 36   | 2                  | 2                                 | 1                           | 2                                  | 2                                     | 2                                         | 2                     | NA                                    | 13                |
| 37   | 2                  | 2                                 | 1                           | 2                                  | 2                                     | 2                                         | 2                     | NA                                    | 13                |
| 38   | 2                  | 2                                 | 0                           | 2                                  | 2                                     | 2                                         | 2                     | NA                                    | 12                |
| 39   | 2                  | 2                                 | 1                           | 2                                  | 2                                     | 2                                         | 2                     | NA                                    | 13                |
| 40   | 2                  | 2                                 | 2                           | 1                                  | 1                                     | 2                                         | 2                     | NA                                    | 12                |
| 41   | 2                  | 2                                 | 1                           | 1                                  | 1                                     | 2                                         | 2                     | NA                                    | 11                |
| 42   | 2                  | 0                                 | 1                           | 1                                  | 1                                     | 2                                         | 2                     | NA                                    | 9                 |
| 43   | 2                  | 2                                 | 1                           | 1                                  | 1                                     | 2                                         | 2                     | NA                                    | 11                |
| 44   | 2                  | 0                                 | 1                           | 2                                  | 2                                     | 2                                         | 2                     | NA                                    | 11                |
| 45   | 2                  | 2                                 | 1                           | 1                                  | 1                                     | 2                                         | 0                     | NA                                    | 9                 |
| 46   | 2                  | 2                                 | 1                           | 1                                  | 1                                     | 2                                         | 0                     | NA                                    | 9                 |
| 47   | 2                  | 2                                 | 1                           | 1                                  | 1                                     | 2                                         | 0                     | NA                                    | 9                 |
| 48   | 2                  | 2                                 | 1                           | 1                                  | 1                                     | 2                                         | 2                     | NA                                    | 11                |
| 49   | 2                  | 1                                 | 0                           | 1                                  | 1                                     | 2                                         | 2                     | NA                                    | 9                 |
| 50   | 2                  | 2                                 | 1                           | 2                                  | 2                                     | 2                                         | 2                     | NA                                    | 13                |
| 51   | 2                  | 2                                 | 1                           | 1                                  | 1                                     | 2                                         | 2                     | NA                                    | 11                |
| 52   | 2                  | 0                                 | 0                           | 2                                  | 2                                     | 2                                         | 2                     | NA                                    | 10                |

|    |   |   |   |   |   |   |   |    |    |
|----|---|---|---|---|---|---|---|----|----|
| 53 | 2 | 2 | 2 | 1 | 1 | 2 | 2 | NA | 12 |
| 54 | 2 | 2 | 1 | 1 | 1 | 2 | 2 | NA | 11 |
| 55 | 2 | 1 | 0 | 1 | 1 | 2 | 2 | NA | 9  |
| 56 | 2 | 2 | 0 | 2 | 2 | 2 | 2 | NA | 12 |
| 57 | 2 | 0 | 2 | 1 | 1 | 2 | 2 | NA | 10 |
| 58 | 2 | 2 | 1 | 1 | 1 | 2 | 2 | NA | 11 |
| 59 | 2 | 2 | 2 | 1 | 1 | 2 | 2 | NA | 12 |
| 60 | 2 | 2 | 1 | 2 | 2 | 2 | 2 | NA | 13 |
| 61 | 2 | 2 | 1 | 1 | 1 | 2 | 2 | NA | 11 |
| 62 | 2 | 2 | 2 | 1 | 1 | 2 | 2 | NA | 12 |
| 63 | 2 | 0 | 1 | 1 | 1 | 2 | 2 | NA | 9  |
| 64 | 2 | 2 | 2 | 1 | 1 | 2 | 2 | NA | 12 |
| 65 | 2 | 2 | 1 | 2 | 2 | 2 | 2 | NA | 13 |
| 66 | 2 | 2 | 0 | 1 | 1 | 2 | 0 | NA | 8  |
| 67 | 2 | 0 | 2 | 1 | 1 | 2 | 2 | NA | 10 |
| 68 | 2 | 2 | 1 | 2 | 2 | 2 | 2 | NA | 13 |
| 69 | 2 | 1 | 1 | 1 | 1 | 2 | 2 | NA | 10 |
| 70 | 2 | 2 | 1 | 1 | 1 | 2 | 2 | NA | 11 |
| 71 | 2 | 2 | 1 | 2 | 2 | 2 | 2 | NA | 13 |
| 72 | 2 | 2 | 1 | 1 | 1 | 2 | 2 | NA | 11 |
| 73 | 2 | 2 | 1 | 2 | 2 | 2 | 2 | NA | 13 |
| 74 | 2 | 0 | 1 | 1 | 1 | 2 | 2 | NA | 9  |
| 75 | 2 | 2 | 1 | 2 | 2 | 2 | 2 | NA | 13 |
| 76 | 2 | 2 | 1 | 1 | 1 | 2 | 2 | NA | 11 |
| 77 | 2 | 2 | 2 | 2 | 2 | 2 | 2 | NA | 14 |
| 78 | 2 | 2 | 1 | 2 | 2 | 2 | 0 | NA | 11 |
| 79 | 2 | 1 | 1 | 1 | 1 | 2 | 2 | NA | 10 |
| 80 | 2 | 0 | 0 | 1 | 1 | 2 | 2 | NA | 8  |
| 81 | 2 | 2 | 2 | 2 | 2 | 2 | 2 | NA | 14 |
| 82 | 2 | 1 | 0 | 1 | 1 | 2 | 2 | NA | 9  |
| 83 | 2 | 0 | 1 | 2 | 2 | 2 | 2 | NA | 11 |
| 84 | 2 | 2 | 0 | 1 | 1 | 2 | 2 | NA | 10 |
| 85 | 2 | 2 | 0 | 1 | 1 | 2 | 2 | NA | 10 |
| 86 | 2 | 0 | 0 | 1 | 1 | 2 | 2 | NA | 8  |
| 87 | 2 | 2 | 1 | 2 | 2 | 2 | 2 | NA | 13 |
| 88 | 2 | 2 | 1 | 2 | 2 | 2 | 2 | NA | 13 |
| 89 | 2 | 2 | 2 | 2 | 2 | 2 | 2 | NA | 14 |
| 90 | 2 | 2 | 2 | 1 | 1 | 2 | 2 | NA | 12 |
| 91 | 2 | 2 | 2 | 1 | 1 | 2 | 2 | NA | 12 |

|     |   |   |   |   |   |   |   |   |   |    |    |
|-----|---|---|---|---|---|---|---|---|---|----|----|
| 92  | 2 | 2 | 0 | 2 | 2 | 2 | 2 | 2 | 2 | NA | 12 |
| 93  | 2 | 0 | 1 | 2 | 2 | 2 | 2 | 2 | 2 | NA | 11 |
| 94  | 2 | 2 | 2 | 2 | 2 | 2 | 2 | 2 | 2 | NA | 14 |
| 95  | 2 | 2 | 1 | 2 | 2 | 2 | 2 | 2 | 2 | NA | 13 |
| 96  | 2 | 2 | 2 | 2 | 2 | 2 | 2 | 2 | 2 | NA | 14 |
| 97  | 2 | 2 | 1 | 1 | 1 | 1 | 2 | 2 | 2 | NA | 11 |
| 98  | 2 | 0 | 1 | 2 | 2 | 2 | 2 | 2 | 2 | NA | 11 |
| 99  | 2 | 1 | 1 | 1 | 1 | 1 | 2 | 2 | 2 | NA | 10 |
| 100 | 2 | 1 | 2 | 1 | 1 | 1 | 2 | 2 | 2 | NA | 11 |
| 101 | 2 | 2 | 0 | 2 | 2 | 2 | 2 | 2 | 2 | NA | 12 |
| 102 | 2 | 1 | 2 | 1 | 1 | 1 | 2 | 2 | 2 | NA | 11 |
| 103 | 2 | 2 | 1 | 1 | 1 | 1 | 2 | 2 | 2 | NA | 11 |
| 104 | 2 | 2 | 1 | 2 | 2 | 2 | 2 | 2 | 2 | NA | 13 |
| 105 | 2 | 2 | 1 | 1 | 1 | 1 | 2 | 2 | 2 | NA | 11 |
| 106 | 2 | 2 | 2 | 2 | 2 | 2 | 2 | 2 | 2 | NA | 14 |
| 107 | 2 | 2 | 1 | 2 | 2 | 2 | 2 | 2 | 2 | NA | 13 |
| 108 | 2 | 2 | 2 | 1 | 1 | 1 | 2 | 2 | 2 | NA | 12 |
| 109 | 2 | 2 | 1 | 1 | 1 | 1 | 2 | 2 | 2 | NA | 11 |
| 110 | 2 | 0 | 0 | 2 | 2 | 2 | 2 | 2 | 2 | NA | 10 |
| 111 | 2 | 2 | 1 | 2 | 2 | 2 | 2 | 2 | 2 | NA | 13 |
| 112 | 2 | 2 | 1 | 1 | 1 | 1 | 2 | 2 | 2 | NA | 11 |
| 113 | 2 | 0 | 1 | 1 | 1 | 1 | 2 | 2 | 2 | NA | 9  |
| 114 | 2 | 0 | 0 | 1 | 1 | 1 | 2 | 2 | 2 | NA | 8  |
| 115 | 2 | 2 | 1 | 2 | 2 | 2 | 2 | 2 | 2 | NA | 13 |
| 116 | 2 | 0 | 2 | 1 | 1 | 1 | 2 | 2 | 2 | NA | 10 |
| 117 | 2 | 2 | 2 | 1 | 1 | 1 | 2 | 2 | 2 | NA | 12 |
| 118 | 2 | 2 | 1 | 2 | 2 | 2 | 2 | 2 | 2 | NA | 13 |
| 119 | 2 | 2 | 2 | 2 | 2 | 2 | 2 | 2 | 2 | NA | 14 |
| 120 | 2 | 2 | 2 | 1 | 1 | 1 | 2 | 2 | 2 | NA | 12 |
| 121 | 2 | 2 | 0 | 2 | 2 | 2 | 2 | 2 | 2 | NA | 12 |
| 122 | 2 | 2 | 1 | 2 | 2 | 2 | 2 | 2 | 2 | NA | 13 |
| 123 | 2 | 2 | 1 | 2 | 2 | 2 | 2 | 2 | 2 | NA | 13 |
| 124 | 2 | 2 | 2 | 1 | 1 | 1 | 2 | 2 | 2 | NA | 12 |
| 125 | 2 | 2 | 1 | 1 | 1 | 1 | 2 | 2 | 2 | NA | 11 |
| 126 | 2 | 2 | 2 | 1 | 1 | 1 | 2 | 2 | 2 | NA | 12 |
| 127 | 2 | 2 | 2 | 1 | 1 | 1 | 2 | 2 | 2 | NA | 12 |
| 128 | 2 | 2 | 1 | 2 | 2 | 2 | 2 | 2 | 2 | NA | 13 |
| 129 | 2 | 2 | 1 | 2 | 2 | 2 | 2 | 2 | 2 | NA | 13 |
| 130 | 2 | 2 | 1 | 1 | 1 | 1 | 2 | 2 | 2 | NA | 11 |

|     |   |   |   |   |   |   |   |    |    |
|-----|---|---|---|---|---|---|---|----|----|
| 131 | 2 | 2 | 1 | 1 | 1 | 2 | 2 | NA | 11 |
| 132 | 2 | 2 | 1 | 2 | 2 | 2 | 2 | NA | 13 |
| 133 | 2 | 2 | 2 | 2 | 2 | 2 | 2 | NA | 14 |
| 134 | 2 | 2 | 0 | 1 | 1 | 2 | 2 | NA | 10 |
| 135 | 2 | 2 | 2 | 1 | 1 | 2 | 2 | NA | 12 |
| 136 | 2 | 0 | 1 | 1 | 1 | 2 | 2 | NA | 9  |
| 137 | 2 | 2 | 0 | 2 | 2 | 2 | 2 | NA | 12 |
| 138 | 2 | 2 | 1 | 1 | 1 | 2 | 2 | NA | 11 |
| 139 | 2 | 0 | 1 | 1 | 1 | 2 | 2 | NA | 9  |
| 140 | 2 | 2 | 1 | 1 | 1 | 2 | 2 | NA | 11 |
| 141 | 2 | 2 | 1 | 2 | 2 | 2 | 2 | NA | 13 |
| 142 | 2 | 2 | 2 | 1 | 1 | 2 | 2 | NA | 12 |
| 143 | 2 | 2 | 1 | 2 | 2 | 2 | 2 | NA | 13 |
| 144 | 2 | 1 | 1 | 2 | 2 | 2 | 2 | NA | 12 |
| 145 | 2 | 2 | 1 | 1 | 1 | 2 | 2 | NA | 11 |
| 146 | 2 | 0 | 1 | 1 | 1 | 2 | 2 | NA | 9  |
| 147 | 2 | 2 | 1 | 2 | 2 | 2 | 2 | NA | 13 |
| 148 | 2 | 2 | 0 | 1 | 1 | 2 | 2 | NA | 10 |
| 149 | 2 | 1 | 0 | 1 | 1 | 2 | 2 | NA | 9  |
| 150 | 2 | 2 | 1 | 1 | 1 | 2 | 2 | NA | 11 |
| 151 | 2 | 2 | 1 | 1 | 1 | 2 | 2 | NA | 11 |
| 152 | 2 | 2 | 2 | 1 | 1 | 2 | 2 | NA | 12 |
| 153 | 2 | 2 | 1 | 2 | 2 | 2 | 2 | NA | 13 |
| 154 | 2 | 2 | 1 | 2 | 2 | 2 | 2 | NA | 13 |
| 155 | 2 | 2 | 1 | 2 | 2 | 2 | 2 | NA | 13 |
| 156 | 2 | 2 | 1 | 2 | 2 | 2 | 2 | NA | 13 |
| 157 | 2 | 2 | 1 | 1 | 1 | 2 | 2 | NA | 11 |
| 158 | 2 | 0 | 0 | 2 | 2 | 2 | 2 | NA | 10 |
| 159 | 2 | 2 | 1 | 1 | 1 | 2 | 2 | NA | 11 |
| 160 | 2 | 2 | 1 | 2 | 2 | 2 | 2 | NA | 13 |
| 161 | 2 | 2 | 1 | 1 | 1 | 2 | 2 | NA | 11 |
| 162 | 2 | 2 | 0 | 2 | 2 | 2 | 2 | NA | 12 |
| 163 | 2 | 2 | 0 | 1 | 1 | 2 | 2 | NA | 10 |
| 164 | 2 | 2 | 1 | 1 | 1 | 2 | 2 | NA | 11 |
| 165 | 2 | 2 | 1 | 1 | 1 | 2 | 2 | NA | 11 |
| 166 | 2 | 2 | 0 | 1 | 1 | 2 | 2 | NA | 10 |
| 167 | 2 | 2 | 1 | 1 | 1 | 2 | 2 | NA | 11 |
| 168 | 2 | 2 | 1 | 1 | 1 | 2 | 2 | NA | 11 |
| 169 | 2 | 2 | 0 | 2 | 2 | 2 | 2 | NA | 12 |

\*MINORS score is a methodological index for non-randomized studies. The items are scored 0 if not reported; 1 when reported but inadequate; and 2 when reported and adequate. The global ideal score is 16 for non-comparative studies.

As low quality was considered a score of  $\leq 8$ .

As intermediate quality was considered a score of 9-11.

As high quality was considered a score of  $\geq 12$ .



**Supplementary Table 4.** Prevalence of organ dysfunctions in adult patients with COVID-19 in the Intensive Care Unit, as reported in included studies (N= 38239 patients).

| Ref. | N of patients | Liver dysfunction, n (%) | ARDS, n (%) | Septic shock, n (%) | CNS dysfunction, n (%) | Coagulopathy, n (%) | Renal dysfunction, n (%) |
|------|---------------|--------------------------|-------------|---------------------|------------------------|---------------------|--------------------------|
| 22   | 52            | 15 (28.8)                | 52 (100.0)  | 18 (34.6)           | NR                     | NR                  | 15 (28.8)                |
| 24   | 117           | 29 (24.8)                | 117 (100.0) | 65 (55.6)           | NR                     | 0 (0.0)             | 0 (0.0)                  |
| 27   | 226           | 42 (18.6)                | 161 (71.2)  | 33 (14.6)           | NR                     | 66 (29.2)           | 70 (31.0)                |
| 38   | 31            | 0 (0.0)                  | 31(100.0)   | 11 (35.5)           | 0 (0.0)                | 4 912.9)            | 9 (29.0)                 |
| 39   | 257           | 0 (0.0)                  | 222 (86.4)  | 170 (66.1)          | 23 (8.9)               | 64 (24.9)           | 128 (49.8)               |
| 42   | 103           | NR                       | 99 (96.1)   | NR                  | NR                     | 26 (25.2)           | 6 (5.8)                  |
| 44   | 239           | 191 (79.9)               | 164 (68.6)  | NR                  | NR                     | 150 (62.8)          | 119 (49.8)               |
| 50   | 80            | NR                       | 80 (100.0)  | NR                  | NR                     | 13 (16.3)           | 20 (25.0)                |
| 51   | 90            | 23 (25.6)                | 68 (75.6)   | 23 (25.6)           | NR                     | 23 (25.6)           | NR                       |
| 52   | 51            | 4 (7.8)                  | NR          | 12 923.5)           | NR                     | NR                  | 5 (9.8)                  |
| 53   | 244           | 0 (0.0)                  | 153 (62.7)  | NR                  | NR                     | 11 (4.5)            | NR                       |
| 57   | 35            | NR                       | 35 (100.0)  | NR                  | NR                     | 0 (0.0)             | 9 (25.7)                 |
| 59   | 60            | 41 (68.3)                | 16 (26.7)   | NR                  | NR                     | 8 (13.3)            | NR                       |
| 60   | 154           | 15 (9.7)                 | 76 (49.4)   | 36 (23.4)           | 25 (16.2)              | 31 (20.1)           | 25 (16.2)                |
| 65   | 92            | NR                       | NR          | 57 (62.0)           | NR                     | 4 (4.3)             | NR                       |
| 68   | 55            | NR                       | NR          | NR                  | NR                     | NR                  | NR                       |
| 71   | 46            | 4 (8.7)                  | 46 (100.0)  | 31 (67.4)           | NR                     | 3 (6.5)             | 10 (21.7)                |
| 73   | 379           | NR                       | NR          | 165 (43.5)          | NR                     | 40 (10.6)           | 193 (50.9)               |
| 75   | 93            | NR                       | NR          | NR                  | NR                     | NR                  | NR                       |
| 76   | 187           | NR                       | 187 (100.0) | NR                  | NR                     | NR                  | NR                       |
| 77   | 59            | NR                       | NR          | NR                  | NR                     | NR                  | 23 (39.0)                |
| 78   | 217           | NR                       | 165 (76.0)  | 143 (65.9)          | NR                     | NR                  | NR                       |
| 86   | 56            | NR                       | 56 (100.0)  | NR                  | NR                     | NR                  | NR                       |
| 87   | 146           | NR                       | NR          | NR                  | NR                     | NR                  | NR                       |
| 88   | 199           | NR                       | NR          | NR                  | NR                     | 50 (25.1)           | NR                       |
| 89   | 173           | NR                       | 173 (100.0) | 1 (0.6)             | NR                     | NR                  | 6 (3.5)                  |
| 93   | 80            | NR                       | 80 (100.0)  | NR                  | NR                     | NR                  | NR                       |
| 95   | 106           | NR                       | NR          | NR                  | NR                     | NR                  | 20 (18.9)                |

|     |       |           |             |            |            |           |             |
|-----|-------|-----------|-------------|------------|------------|-----------|-------------|
| 104 | 195   | NR        | 162 (83.1)  | 35 (17.9)  | NR         | 49 (25.1) | 49 (25.1)   |
| 107 | 281   | NR        | NR          | NR         | NR         | 71 (25.3) | NR          |
| 110 | 50    | NR        | 49 (98.0)   | 0 (0.0)    | NR         | NR        | NR          |
| 111 | 204   | NR        | NR          | NR         | NR         | NR        | NR          |
| 115 | 30    | NR        | 27 (90.0)   | NR         | NR         | 4 (13.3)  | NR          |
| 117 | 317   | NR        | 213 (67.2)  | NR         | NR         | NR        | NR          |
| 123 | 164   | NR        | 164 (100.0) | NR         | NR         | NR        | NR          |
| 126 | 9900  | NR        | 7425 (75.0) | NR         | NR         | NR        | 2475 (25.0) |
| 128 | 67    | NR        | 51 (76.1)   | NR         | NR         | NR        | 17 (25.4)   |
| 129 | 32    | 14 (43.8) | 32 (100.0)  | 1 (3.1)    | NR         | 8 (25.0)  | 8 (25.0)    |
| 130 | 147   | NR        | 101 (68.7)  | NR         | NR         | NR        | NR          |
| 132 | 89    | NR        | NR          | NR         | NR         | NR        | NR          |
| 133 | 74    | 18 (24.3) | 74 (100.0)  | 68 (91.9)  | NR         | 17 (23.0) | 35 (47.3)   |
| 134 | 4643  | NR        | 2233 (48.1) | NR         | NR         | NR        | 979 (21.1)  |
| 135 | 3099  | NR        | NR          | NR         | 681 (22.0) | NR        | 1330 (42.9) |
| 140 | 2088  | NR        | 2044 (97.9) | NR         | NR         | NR        | NR          |
| 141 | 568   | NR        | 521 (91.7)  | 102 (18.0) | 26 (4.6)   | NR        | 96 (16.9)   |
| 143 | 136   | 40 (29.4) | 119 (87.5)  | 91 (66.9)  | NR         | NR        | 56 (41.2)   |
| 145 | 61    | NR        | 37 (60.7)   | NR         | NR         | NR        | NR          |
| 147 | 158   | NR        | NR          | NR         | NR         | NR        | NR          |
| 153 | 57    | NR        | NR          | 19 (33.3)  | NR         | NR        | NR          |
| 155 | 223   | NR        | NR          | 90 (40.4)  | NR         | NR        | NR          |
| 156 | 671   | NR        | NR          | NR         | NR         | NR        | 263 (39.2)  |
| 157 | 36    | NR        | 36 (100.0)  | NR         | NR         | NR        | NR          |
| 158 | 77    | 17 (22.1) | 75 (97.4)   | NR         | NR         | NR        | 25 (32.5)   |
| 164 | 45    | 27 (60.0) | 34 (75.6)   | NR         | NR         | 23 (51.1) | 15 (33.3)   |
| 165 | 72    | 15 (20.8) | 62 (86.1)   | NR         | NR         | 3 (4.2)   | NR          |
| 168 | 10741 | NR        | NR          | NR         | NR         | NR        | 5001 (46.6) |

Abbreviations: ARDS, acute respiratory distress syndrome; CNS, central nervous system; NR, not reported.

**Supplementary Table 5.** Prevalence of specific organ dysfunctions in children hospitalized with COVID-19, as reported in included studies (N= 1213 patients).

| Ref. | N of patients | ICU | Shock, n (%) | Liver dysfunction, n (%) | ARDS, n (%) | Coagulopathy, n (%) | CNS dysfunction, n (%) | Renal dysfunction, n (%) |
|------|---------------|-----|--------------|--------------------------|-------------|---------------------|------------------------|--------------------------|
| 35   | 81            | No  | 2 (2.5)      | 0 (0.0)                  | 1 (1.2)     | 0 (0.0)             | 0 (0.0)                | 0 (0.0)                  |
| 80   | 33            | No  | 17 (51.5)    | 8 (24.2)                 | NR          | 8 (24.2)            | NR                     | 8 (24.2)                 |
| 136  | 286           | No  | 115 (40.2)   | NR                       | NR          | 72 (25.2)           | 43 (15.0)              | NR                       |
| 142  | 191           | No  | NR           | NR                       | NR          | NR                  | NR                     | NR                       |
| 146  | 106           | No  | NR           | NR                       | NR          | NR                  | 13 (12.3)              | NR                       |
| 166  | 281           | No  | 26 (9.3)     | NR                       | 27 (9.6)    | NR                  | NR                     | 37 (13.2)                |
| 83   | 45            | Yes | 42 (93.3)    | NR                       | NR          | 21 (46.7)           | NR                     | 19 (42.2)                |
| 98   | 74            | Yes | 42 (56.8)    | 14 (18.9)                | 11 (14.9)   | NR                  | 5 (6.8)                | 12 (16.2)                |
| 116  | 116           | Yes | 14 (12.1)    | NR                       | NR          | NR                  | NR                     | 32 (27.6)                |

Abbreviations: ARDS, acute respiratory distress syndrome; NR, not reported.
